# Supplementary material
Source: HighWire-hosted journal article supplement (http://www.jneurosci.org/highwire/filestream/599076/field_highwire_adjunct_files/0/pieperhoff_jneurosci_supplemental_material.pdf)
Supplement: pieperhoff_jneurosci_supplemental_material.pdf [file pieperhoff_jneurosci_supplemental_material.pdf]

**Supplemental table 1:** Clusters of significant age-related volume decline, determined by voxel-wise linear regression of the local volume ratio, depending on age (**volume data adjusted by skull size**); Reference image = MNI single subject template

Mean t-value within each cluster; cluster volume in mm<sup>3</sup>; X<sub>min</sub>, X<sub>max</sub> etc. = extent coordinates in mm of each cluster, related to the MNI single subject template; overlaps of each cluster with anatomical ROI's: In parentheses relative overlapping volume (in percent) of the cluster and of the ROI (e.g. le. Putamen (45/18) means: 45 % of the cluster is overlapping with the left putamen, and 18 % of the left putamen is overlapping with the cluster).

The threshold for the definition of the clusters within the t-value map corresponds to a significance level of p<0.01 (for a two-sided t-test).

Abbreviations are explained in appendix C.

Only clusters larger than 1000 mm<sup>3</sup> are presented. Note that macroanatomical and cytoarchitectonical areas in part overlap with each other.

| Mean t-Value | Volume | X <sub>min</sub> | X <sub>max</sub> | Y <sub>min</sub> | Y <sub>max</sub> | Z <sub>min</sub> | Z <sub>max</sub> | Overlaps                                                                                                                                                                                                                                                        |
|--------------|--------|------------------|------------------|------------------|------------------|------------------|------------------|-----------------------------------------------------------------------------------------------------------------------------------------------------------------------------------------------------------------------------------------------------------------|
| 3.168        | 12344  | -46              | 20               | -78              | -22              | -52              | -6               | <b>Cerebellum -</b><br><b>- left hemisphere:</b> WM (28.39/24.40), Lobus ant. (12.05/11.18), Lobus post. (27.74/5.43) ;<br><b>- right hemisphere:</b> WM (6.35/5.07), Lobus ant. (4.02/5.75) ;<br>Vermis (7.65/7.48)<br><b>other regions:</b> Pons (11.08/6.58) |
| 3.171        | 6200   | -26              | 20               | 4                | 66               | -28              | -4               | le. G. frontoorbitalis med. (18.19/10.73), ri. G. frontoorbitalis med. (13.94/7.20), le. G. rectus (16.39/16.26), ri. G. rectus (14.45/14.56), le. Subcallosal area (3.74/17.40), le. Ncl caudatus (6.58/6.62)                                                  |
| 3.278        | 5944   | 4                | 32               | -62              | -10              | 32               | 72               | ri. Area 2 (10.63/5.48), ri. Fiber CST (11.98/4.57), ri. Lobulus parietalis sup. (20.86/5.71), ri. G. cinguli (11.84/2.48), ri. G. postcentralis (14.54/3.33), ri. WM (44.55/1.29)                                                                              |

**Supplemental table 1:** Clusters of significant age-related volume decline, determined by voxel-wise linear regression of the local volume ratio, depending on age (**volume data adjusted by skull size**); Reference image = MNI single subject template

| Mean t-Value | Volume | X <sub>min</sub> | X <sub>max</sub> | Y <sub>min</sub> | Y <sub>max</sub> | Z <sub>min</sub> | Z <sub>max</sub> | Overlaps                                                                                                                                                                                                                                                                                                                      |
|--------------|--------|------------------|------------------|------------------|------------------|------------------|------------------|-------------------------------------------------------------------------------------------------------------------------------------------------------------------------------------------------------------------------------------------------------------------------------------------------------------------------------|
| 3.368        | 5608   | -8               | 14               | 10               | 50               | -14              | 40               | le. G. cinguli (42.08/7.75), ri. G. cinguli (55.21/11.86)                                                                                                                                                                                                                                                                     |
| 3.496        | 4424   | 6                | 26               | -32              | -6               | -10              | 18               | <b>right Thalamus:</b> Total (65.64/39.50), ANT (0.18/8.69), VA (15.19/60.65), VL (29.29/86.64), LP (8.68/46.63), PU (2.89/6.45), CM (0.54/12.50), VPL (7.59/57.52), CGM (0.36/16.43), Lamina medullaris med. (0.72/7.75) ;<br><b>other regions:</b> ri. CST (22.78/5.60), Substantia grisea (0.54/5.87), ri. WM (31.83/0.68) |
| 3.255        | 3728   | -34              | -6               | -26              | -6               | -6               | 22               | <b>left Thalamus:</b> Total (57.73/25.63), ANT (0.21/6.90), VA (13.52/43.28), VL (29.83/74.55), LP (4.29/21.40), VPL (8.58/37.99), Lamina medullaris med. (1.07/6.64) ;<br><b>other regions:</b> le. CST (35.62/6.87), le. WM (41.42/0.69)                                                                                    |
| 3.084        | 3392   | 18               | 48               | -78              | -52              | -44              | -26              | <b>right Cerebellum:</b> WM (8.25/1.96), Lobus post. (91.75/4.32)                                                                                                                                                                                                                                                             |
| 3.221        | 2024   | 16               | 44               | -68              | -54              | 28               | 64               | ri. Lobulus parietalis sup. (31.23/3.31), ri. Lobulus parietalis inf. (12.65/1.94), ri. WM (52.17/0.47)                                                                                                                                                                                                                       |
| 3.184        | 1776   | -40              | -22              | -8               | 12               | -6               | 18               | le. SII Op3 (11.26/5.52), le. Insula (23.42/3.99), le. Putamen (36.04/11.05), le. WM (35.59/0.30)                                                                                                                                                                                                                             |
| 3.324        | 1640   | 10               | 30               | 42               | 66               | 14               | 38               | ri. G. frontalis sup. (74.15/1.78), ri. G. frontalis med. (18.54/0.84)                                                                                                                                                                                                                                                        |
| 3.373        | 1496   | 32               | 40               | -20              | 2                | -6               | 14               | ri. SII Op3 (7.49/2.31), ri. Insula (42.25/6.20), ri. Putamen (11.76/1.52), ri. WM (45.99/0.32)                                                                                                                                                                                                                               |
| 3.201        | 1280   | -48              | -34              | 44               | 62               | -16              | 10               | le. G. frontalis med. (17.50/0.94), le. G. frontoorbitalis lat. (26.25/4.25)                                                                                                                                                                                                                                                  |
| 3.204        | 1216   | 50               | 68               | -60              | -32              | -6               | 12               | ri. G. temporalis med. (86.18/4.24), ri. WM (6.58/0.02)                                                                                                                                                                                                                                                                       |
| 3.338        | 1048   | -48              | -34              | 38               | 54               | 14               | 28               | le. G. frontalis med. (61.83/2.51), le. WM (16.03/0.07)                                                                                                                                                                                                                                                                       |
| 3.094        | 1008   | -46              | -28              | -66              | -48              | 28               | 52               | le. Lobulus parietalis sup. (19.05/0.75), le. Lobulus parietalis inf. (31.75/1.79), le. G.                                                                                                                                                                                                                                    |

**Supplemental table 1:** Clusters of significant age-related volume decline, determined by voxel-wise linear regression of the local volume ratio, depending on age (**volume data adjusted by skull size**); Reference image = MNI single subject template

| Mean t-Value | Volume | X <sub>min</sub> | X <sub>max</sub> | Y <sub>min</sub> | Y <sub>max</sub> | Z <sub>min</sub> | Z <sub>max</sub> | Overlaps                                                                                                                                                              |
|--------------|--------|------------------|------------------|------------------|------------------|------------------|------------------|-----------------------------------------------------------------------------------------------------------------------------------------------------------------------|
|              |        |                  |                  |                  |                  |                  |                  | supramarginalis (33.33/1.39), le. WM (13.49/0.08)                                                                                                                     |
| 3.338        | 880    | -20              | -12              | -50              | -36              | 44               | 62               | le. Lobulus parietalis sup. (21.82/0.96), le. G. cinguli (15.45/0.47), le. G. postcentralis (15.45/0.45), le. WM (47.27/0.19)                                         |
| 3.295        | 808    | -36              | -28              | 16               | 30               | -10              | 6                | le. G. frontalis inf. (15.84/0.60), le. Insula (62.38/5.24)                                                                                                           |
| 3.229        | 808    | 22               | 40               | -10              | 0                | 44               | 64               | ri. Area 6 (53.47/0.97), ri. G. frontalis sup. (42.57/0.54), ri. G. frontalis med. (28.71/0.77), ri. WM (24.75/0.09)                                                  |
| 3.335        | 720    | -30              | -22              | 40               | 54               | 24               | 36               | le. G. frontalis sup. (25.56/0.43), le. G. frontalis med. (52.22/1.47)                                                                                                |
| 3.34         | 696    | 40               | 50               | 48               | 58               | 0                | 16               | ri. G. frontalis med. (59.77/1.25)                                                                                                                                    |
| 3.092        | 632    | 20               | 34               | 18               | 34               | 36               | 50               | ri. G. frontalis sup. (40.51/0.35), ri. G. frontalis med. (56.96/1.11)                                                                                                |
| 3.281        | 592    | -24              | -14              | -76              | -64              | 32               | 50               | le. Lobulus parietalis sup. (24.32/0.79), le. Lobulus parietalis inf. (5.41/0.09), le. Precuneus (31.08/1.22), le. WM (37.84/0.10)                                    |
| 3.043        | 584    | -18              | -6               | 50               | 60               | 26               | 46               | le. G. frontalis sup. (68.49/0.76)                                                                                                                                    |
| 3.228        | 576    | -58              | -46              | -56              | -36              | 26               | 34               | le. Lobulus parietalis inf. (12.50/0.41), le. G. temporalis sup. (12.50/0.18), le. G. supramarginalis (70.83/1.59)                                                    |
| 3.173        | 480    | 36               | 48               | -48              | -36              | -62              | -52              | ri. Cerebellum Lobus post (8.33/0.09)                                                                                                                                 |
| 2.854        | 400    | 12               | 22               | -54              | -44              | -62              | -50              | ri. Cerebellum Lobus post (100.00/0.57)                                                                                                                               |
| 3.046        | 384    | -16              | -8               | -24              | -14              | 40               | 54               | le. CST (20.83/0.47), le. Area 6 (37.50/0.35), le. G. cinguli (39.58/0.55), le. G. frontalis sup. (16.67/0.10), le. G. precentralis (16.67/0.21), le. WM (27.08/0.05) |
| 3.087        | 328    | -48              | -38              | -62              | -52              | 14               | 24               | le. G. temporalis sup. (31.71/0.26), le. G. temporalis med. (19.51/0.19), le. G. supramarginalis (7.32/0.13), le. WM (39.02/0.07)                                     |
| 2.983        | 320    | -32              | -22              | -46              | -36              | 50               | 62               | le. Area 2 (85.00/1.78), le. Area 1 (25.00/0.48), le. Lobulus parietalis sup. (25.00/0.35), le. G. postcentralis (62.50/0.52), le. WM (5.00/0.01)                     |

**Supplemental table 1:** Clusters of significant age-related volume decline, determined by voxel-wise linear regression of the local volume ratio, depending on age (**volume data adjusted by skull size**); Reference image = MNI single subject template

| Mean t-Value | Volume | X <sub>min</sub> | X <sub>max</sub> | Y <sub>min</sub> | Y <sub>max</sub> | Z <sub>min</sub> | Z <sub>max</sub> | Overlaps                                                                                                                                              |
|--------------|--------|------------------|------------------|------------------|------------------|------------------|------------------|-------------------------------------------------------------------------------------------------------------------------------------------------------|
| 2.9          | 296    | -44              | -38              | -46              | -38              | -2               | 8                | le. WM (100.00/0.14)                                                                                                                                  |
| 2.947        | 280    | -28              | -20              | -34              | -30              | 0                | 10               | le. Thalamus (22.86/0.78), le. PU (22.86/3.62), le. WM (77.14/0.09)                                                                                   |
| 3.004        | 264    | 4                | 8                | -18              | -10              | 34               | 44               | ri. Area 6 (6.06/0.05), ri. G. cinguli (81.82/0.78), ri. WM (18.18/0.03)                                                                              |
| 3.077        | 264    | -36              | -24              | -6               | 2                | 46               | 54               | le. Area 6 (24.24/0.13), le. G. frontalis sup. (27.27/0.20), le. G. frontalis med. (9.09/0.08), le. G. precentralis (33.33/0.21), le. WM (27.27/0.02) |
| 3.414        | 248    | 24               | 32               | 54               | 60               | -2               | 2                | ri. G. frontalis sup. (35.48/0.15), ri. G. frontalis med. (38.71/0.29)                                                                                |
| 3.038        | 232    | -50              | -38              | -40              | -36              | 36               | 46               | le. G. supramarginalis (96.55/0.86)                                                                                                                   |
| 3.035        | 224    | -10              | 2                | -28              | -22              | -24              | -16              | le. Brainstem (25.00/1.54), Pons (75.00/0.66)                                                                                                         |
| 3.031        | 224    | 4                | 10               | -6               | 4                | 34               | 44               | ri. Area 6 (21.43/0.11), ri. G. cinguli (92.86/0.81), ri. WM (7.14/0.00)                                                                              |
| 3.127        | 224    | -10              | -4               | -14              | -8               | 58               | 66               | le. Area 6 (100.00/0.54), le. G. frontalis sup. (57.14/0.25), le. G. precentralis (35.71/0.25), le. WM (7.14/0.01)                                    |
| 3.089        | 208    | -26              | -22              | 22               | 30               | 44               | 50               | le. G. frontalis sup. (15.38/0.08), le. G. frontalis med. (73.08/0.51)                                                                                |
| 2.919        | 200    | -24              | -20              | -86              | -80              | -4               | 4                | le. WM (92.00/0.08)                                                                                                                                   |
| 2.918        | 200    | 10               | 18               | -74              | -62              | -4               | 2                | ri. V1 (16.00/0.06), ri. V2 (84.00/0.46), ri. G. lingualis (60.00/0.64), ri. WM (40.00/0.04)                                                          |
| 2.955        | 192    | 34               | 42               | -84              | -76              | 10               | 12               | ri. G. occipitalis inf. (66.67/0.54), ri. WM (33.33/0.03)                                                                                             |
| 2.83         | 184    | 34               | 48               | 26               | 28               | -4               | 0                | ri. G. frontoorbitalis lat. (100.00/1.81)                                                                                                             |
| 3.035        | 184    | -12              | -6               | -62              | -56              | 16               | 22               | le. Precuneus (100.00/1.28)                                                                                                                           |
| 3.058        | 160    | 32               | 36               | 16               | 20               | 0                | 6                | ri. Insula (100.00/1.53)                                                                                                                              |
| 3.18         | 152    | -34              | -30              | 32               | 36               | 34               | 42               | le. G. frontalis med. (94.74/0.63)                                                                                                                    |
| 3.128        | 144    | 2                | 6                | -24              | -20              | -16              | -10              | ri. Ncl. ruber (66.67/18.74), ri. Brainstem (33.33/0.80)                                                                                              |
| 3.064        | 136    | 22               | 30               | -20              | -16              | -18              | -12              | <b>right Hippocampus:</b> Total (100.00/1.28) ri. Cornu ammonis (100.00/1.12), ri.                                                                    |

**Supplemental table 1:** Clusters of significant age-related volume decline, determined by voxel-wise linear regression of the local volume ratio, depending on age (**volume data adjusted by skull size**); Reference image = MNI single subject template

| Mean t-Value | Volume | X <sub>min</sub> | X <sub>max</sub> | Y <sub>min</sub> | Y <sub>max</sub> | Z <sub>min</sub> | Z <sub>max</sub> | Overlaps                                                                                                                                                      |
|--------------|--------|------------------|------------------|------------------|------------------|------------------|------------------|---------------------------------------------------------------------------------------------------------------------------------------------------------------|
|              |        |                  |                  |                  |                  |                  |                  | Fascia dentata (88.24/2.04), ri. Subiculum (100.00/1.69)                                                                                                      |
| 3.152        | 136    | -6               | 0                | 48               | 56               | -6               | -4               | le. G. cinguli (35.29/0.15), le. G. frontalis sup. (52.94/0.15), ri. G. frontalis sup. (5.88/0.00), le. G. rectus (11.76/0.10)                                |
| 2.976        | 136    | -56              | -42              | 34               | 40               | 2                | 6                | le. Area 45 (52.94/0.75), le. G. frontalis inf. (94.12/0.53), le. WM (5.88/0.00)                                                                              |
| 2.912        | 136    | -34              | -30              | -72              | -64              | 30               | 34               | le. Lobulus parietalis inf. (88.24/0.73), le. WM (11.76/0.01)                                                                                                 |
| 2.843        | 128    | -16              | -6               | 64               | 66               | -22              | -12              | le. G. frontoorbitalis med. (68.75/0.56)                                                                                                                      |
| 2.918        | 128    | -14              | -10              | -94              | -90              | 16               | 24               | le. V2 (50.00/0.19), le. Cuneus (25.00/0.20), le. G. occipitalis sup. (31.25/0.49), le. WM (43.75/0.02)                                                       |
| 3.02         | 120    | 30               | 34               | -16              | -10              | -24              | -20              | ri. Amygdala (13.33/0.10), ri. Cornu ammonis (100.00/1.33), ri. Fascia dentata (93.33/2.39), ri. Subiculum (66.67/1.17), ri. Hippocampus (100.00/1.23)        |
| 2.958        | 120    | 34               | 38               | 20               | 24               | -14              | -8               | ri. G. frontoorbitalis med. (93.33/0.75), ri. Insula (6.67/0.12)                                                                                              |
| 2.859        | 120    | 12               | 26               | 66               | 70               | -14              | -10              | ri. G. frontoorbitalis lat. (6.67/0.08), ri. G. frontoorbitalis med. (6.67/0.03)                                                                              |
| 2.925        | 120    | 42               | 48               | -14              | -8               | 14               | 18               | ri. SII Op1 (6.67/0.02), ri. SII Op2 (20.00/0.54), ri. SII Op3 (100.00/1.95), ri. SII Op4 (40.00/0.77), ri. G. postcentralis (93.33/0.39), ri. WM (6.67/0.01) |
| 3.08         | 112    | 32               | 44               | -32              | -24              | -32              | -30              | ri. G. fusiformis (14.29/0.20)                                                                                                                                |
| 2.812        | 112    | 8                | 12               | 10               | 18               | 32               | 38               | ri. G. cinguli (7.14/0.05), ri. G. frontalis sup. (92.86/0.16)                                                                                                |
| 3.014        | 104    | -6               | -4               | -12              | -4               | -12              | -6               | le. Brainstem (46.15/0.75), le. WM (53.85/0.02)                                                                                                               |
| 3.105        | 104    | 32               | 36               | -92              | -90              | 0                | 6                | ri. G. occipitalis inf. (30.77/0.29), ri. WM (69.23/0.03)                                                                                                     |
| 3.157        | 104    | 48               | 56               | -32              | -30              | 40               | 46               | ri. G. supramarginalis (84.62/0.36), ri. WM (15.38/0.00)                                                                                                      |
| 2.851        | 96     | 34               | 38               | 56               | 60               | 2                | 8                | ri. G. frontalis sup. (16.67/0.03), ri. G. frontalis med. (75.00/0.21)                                                                                        |
| 2.855        | 88     | -56              | -50              | -34              | -28              | 38               | 40               | le. G. supramarginalis (63.64/0.26), le. WM (36.36/0.01)                                                                                                      |
| 2.826        | 80     | -34              | -30              | 26               | 28               | -34              | -32              | le. G. temporalis sup. (40.00/0.09)                                                                                                                           |

**Supplemental table 1:** Clusters of significant age-related volume decline, determined by voxel-wise linear regression of the local volume ratio, depending on age (**volume data adjusted by skull size**); Reference image = MNI single subject template

---

| Mean t-Value | Volume | X <sub>min</sub> | X <sub>max</sub> | Y <sub>min</sub> | Y <sub>max</sub> | Z <sub>min</sub> | Z <sub>max</sub> | Overlaps                                                                                                                        |
|--------------|--------|------------------|------------------|------------------|------------------|------------------|------------------|---------------------------------------------------------------------------------------------------------------------------------|
| 2.907        | 80     | 22               | 26               | 8                | 12               | 46               | 52               | ri. G. frontalis sup. (60.00/0.06), ri. G. frontalis med. (40.00/0.11)                                                          |
| 2.794        | 80     | 26               | 30               | -24              | -22              | 52               | 58               | ri. CST (50.00/0.25), ri. Area 4p (40.00/0.44), ri. Area 3a (10.00/0.26), ri. G. precentralis (20.00/0.04), ri. WM (80.00/0.03) |
| 2.858        | 80     | -24              | -20              | 4                | 8                | 58               | 62               | le. Area 6 (80.00/0.17), le. G. frontalis sup. (90.00/0.12)                                                                     |

**Supplemental table 2:** Results of linear regression of anatomical ROI-volumes (**volume data adjusted by skull size**), depending on age

Reference image = MNI single subject template

Volume offset = extrapolated ROI volume at age 20 years in mm<sup>3</sup>; volume slope = annualized volume difference in mm<sup>3</sup> / year; relative volume slope = volume slope / volume offset x 100 %; P = p-value, corresponding to the measured t-value; R = correlation; abbreviations are explained in appendix D. Note that macroanatomical and cytoarchitectonical areas in part overlap with each other.

(1-9) Cytoarchitectonically defined areas and fiber tracks: (1) Amunts et al. (1999); (2) Amunts et al. (2005); (3) Geyer et al. (1999); (4) Geyer et al. (1994); (5) Geyer et al. (2004); (6) Rademacher et al. (2001); (7) Buerger et al. (2006); (8) Grefkes et al. (2001); (9) Eickhoff et al. (2006); (10) Macroanatomical labelling of the MNI single subject template (<http://www.loni.ucla.edu/ICBM>);

| Region                  | Side  | Volume offset (20 y) [mm <sup>3</sup> ] | Volume slope [mm <sup>3</sup> / year] | relative Volume slope [% / year] | t-Value | P             | R     |
|-------------------------|-------|-----------------------------------------|---------------------------------------|----------------------------------|---------|---------------|-------|
| Amygdala <sup>(2)</sup> | left  | 5423.7                                  | -3.5581                               | -0.0656                          | -0.465  | 0.6443        | 0.066 |
|                         | right | 5094.4                                  | -3.8113                               | -0.0748                          | -0.578  | 0.5659        | 0.082 |
| ANT <sup>(10)</sup>     | left  | 116.2                                   | -0.2931                               | -0.2523                          | -1.049  | 0.2995        | 0.148 |
|                         | right | 148.9                                   | -0.1188                               | -0.0798                          | -0.381  | 0.7048        | 0.054 |
| Area 1 <sup>(3)</sup>   | left  | 10578.9                                 | -9.2479                               | -0.0874                          | -0.467  | 0.6425        | 0.067 |
|                         | right | 8400.2                                  | -2.6394                               | -0.0314                          | -0.168  | 0.8671        | 0.024 |
| Area 2 <sup>(8)</sup>   | left  | 10501.7                                 | -26.3437                              | -0.2509                          | -1.776  | 0.0819        | 0.246 |
|                         | right | 7987.4                                  | -25.5443                              | -0.3198                          | -2.026  | <b>0.0483</b> | 0.278 |
| Area 3a <sup>(3)</sup>  | left  | 5886.3                                  | -9.9074                               | -0.1683                          | -1.289  | 0.2034        | 0.181 |
|                         | right | 5956.5                                  | -17.936                               | -0.3011                          | -2.14   | <b>0.0374</b> | 0.292 |
| Area 3b <sup>(3)</sup>  | left  | 12171.8                                 | -13.4072                              | -0.1101                          | -0.742  | 0.4614        | 0.105 |

**Supplemental table 2:** Results of linear regression of anatomical ROI-volumes (**volume data adjusted by skull size**), depending on age

Reference image = MNI single subject template

| Region                     | Side  | Volume offset (20 y) [mm <sup>3</sup> ] | Volume slope [mm <sup>3</sup> / year] | relative Volume slope [% / year] | t-Value | P             | R     |
|----------------------------|-------|-----------------------------------------|---------------------------------------|----------------------------------|---------|---------------|-------|
|                            | right | 13462.0                                 | -24.0251                              | -0.1785                          | -1.217  | 0.2294        | 0.171 |
| Area 44 <sup>(1)</sup>     | left  | 10332.6                                 | -36.2104                              | -0.3504                          | -2.444  | <b>0.0182</b> | 0.33  |
|                            | right | 7094.0                                  | -13.6849                              | -0.1929                          | -1.055  | 0.2965        | 0.149 |
| Area 45 <sup>(1)</sup>     | left  | 9172.1                                  | -24.7208                              | -0.2695                          | -1.766  | 0.0836        | 0.245 |
|                            | right | 8344.6                                  | -19.203                               | -0.2301                          | -1.305  | 0.1981        | 0.183 |
| Area 4a <sup>(4)</sup>     | left  | 15114.2                                 | 7.5786                                | 0.0501                           | 0.267   | 0.7904        | 0.038 |
|                            | right | 13268.8                                 | -3.537                                | -0.0267                          | -0.133  | 0.8944        | 0.019 |
| Area 4p <sup>(4)</sup>     | left  | 8363.5                                  | -1.4081                               | -0.0168                          | -0.127  | 0.8992        | 0.018 |
|                            | right | 8837.1                                  | -17.4341                              | -0.1973                          | -1.249  | 0.2177        | 0.176 |
| Area 6 <sup>(5)</sup>      | left  | 34155.9                                 | -2.6718                               | -0.0078                          | -0.05   | 0.9605        | 0.007 |
|                            | right | 34914.2                                 | -19.1086                              | -0.0547                          | -0.359  | 0.7211        | 0.051 |
| Brain                      | both  | 1520071.5                               | -2251.5311                            | -0.1481                          | -1.553  | 0.1269        | 0.217 |
|                            | left  | 763316.5                                | -1086.0298                            | -0.1423                          | -1.494  | 0.1415        | 0.209 |
|                            | right | 778468.2                                | -1133.9542                            | -0.1457                          | -1.518  | 0.1354        | 0.212 |
| Brainstem <sup>(10)</sup>  | left  | 4485.9                                  | -2.2006                               | -0.0491                          | -0.406  | 0.6862        | 0.058 |
|                            | right | 4632.2                                  | -5.5619                               | -0.1201                          | -0.967  | 0.3384        | 0.137 |
| Cerebellum <sup>(10)</sup> | left  | 80800.1                                 | -255.2249                             | -0.3159                          | -2.281  | <b>0.0269</b> | 0.31  |
|                            | right | 78758.2                                 | -203.4446                             | -0.2583                          | -1.878  | 0.0664        | 0.259 |
| Cerebellum Lobus ant.      | left  | 9908.2                                  | -21.8066                              | -0.2201                          | -1.544  | 0.1291        | 0.215 |
|                            | right | 6218.5                                  | -3.7921                               | -0.0061                          | -0.445  | 0.6583        | 0.063 |



**Supplemental table 2:** Results of linear regression of anatomical ROI-volumes (**volume data adjusted by skull size**), depending on age

Reference image = MNI single subject template

| Region                             | Side  | Volume offset (20 y) [mm <sup>3</sup> ] | Volume slope [mm <sup>3</sup> / year] | relative Volume slope [% / year] | t-Value | P             | R     |
|------------------------------------|-------|-----------------------------------------|---------------------------------------|----------------------------------|---------|---------------|-------|
| Cerebellum Lobus post.             | left  | 51608.2                                 | -95.7566                              | -0.1855                          | -1.284  | 0.205         | 0.18  |
|                                    | right | 56549.9                                 | -134.5333                             | -0.2379                          | -1.737  | 0.0886        | 0.241 |
| Cerebellum Lobus flocculonodularis | left  | 810.5                                   | -1.6                                  | -0.1974                          | -1.17   | 0.2477        | 0.165 |
|                                    | right | 586.8                                   | -1.0202                               | -0.1739                          | -1.077  | 0.287         | 0.152 |
| Cerebellum Vermis <sup>(10)</sup>  | mid   | 9741.3                                  | -8.1303                               | -0.0835                          | -0.621  | 0.5375        | 0.088 |
| Cerebellum WM                      | left  | 18012.4                                 | -128.2004                             | -0.7117                          | -2.918  | <b>0.0053</b> | 0.385 |
|                                    | right | 14700.6                                 | -66.7117                              | -0.4538                          | -2.092  | <b>0.0417</b> | 0.286 |
| Cerebrum WM <sup>(10)</sup>        | left  | 176436.5                                | -253.4979                             | -0.1437                          | -1.417  | 0.1629        | 0.198 |
|                                    | right | 178777.7                                | -252.274                              | -0.1411                          | -1.111  | 0.2721        | 0.157 |
| CGL <sup>(10)</sup>                | left  | 147.5                                   | -0.1611                               | -0.1092                          | -0.826  | 0.413         | 0.117 |
|                                    | right | 62.7                                    | -0.0718                               | -0.1145                          | -0.966  | 0.3389        | 0.137 |
| CGM <sup>(10)</sup>                | left  | 117.0                                   | -0.2947                               | -0.2519                          | -1.611  | 0.1136        | 0.224 |
|                                    | right | 85.2                                    | -0.2366                               | -0.2778                          | -1.818  | 0.0751        | 0.251 |
| CM <sup>(10)</sup>                 | left  | 62.8                                    | 0.0864                                | 0.1376                           | 0.809   | 0.4223        | 0.115 |
|                                    | right | 57.9                                    | -0.2296                               | -0.3966                          | -1.758  | 0.085         | 0.244 |
| Cornu ammonis <sup>(2)</sup>       | left  | 8112.3                                  | -3.5744                               | -0.0441                          | -0.354  | 0.7245        | 0.051 |
|                                    | right | 8279.6                                  | -9.8617                               | -0.1191                          | -1.243  | 0.2199        | 0.175 |
| Corpus mamillare <sup>(10)</sup>   | left  | 56.4                                    | 0.1516                                | 0.2688                           | 1.236   | 0.2225        | 0.174 |
|                                    | right | 44.4                                    | 0.2005                                | 0.4513                           | 1.886   | 0.0653        | 0.26  |
| Corticospinal tract <sup>(6)</sup> | left  | 16332.6                                 | -33.5228                              | -0.2053                          | -2.095  | <b>0.0413</b> | 0.287 |

**Supplemental table 2:** Results of linear regression of anatomical ROI-volumes (**volume data adjusted by skull size**), depending on age

Reference image = MNI single subject template

| Region                                  | Side  | Volume offset (20 y) [mm <sup>3</sup> ] | Volume slope [mm <sup>3</sup> / year] | relative Volume slope [% / year] | t-Value | P             | R     |
|-----------------------------------------|-------|-----------------------------------------|---------------------------------------|----------------------------------|---------|---------------|-------|
|                                         | right | 14225.1                                 | -49.0162                              | -0.3446                          | -3.143  | <b>0.0028</b> | 0.41  |
| Cuneus <sup>(10)</sup>                  | left  | 8154.1                                  | 2.2158                                | 0.0272                           | 0.167   | 0.8684        | 0.024 |
|                                         | right | 8408.9                                  | 4.4605                                | 0.0530                           | 0.359   | 0.7211        | 0.051 |
| Entorhinal cortex <sup>(10)</sup>       | left  | 1036.9                                  | 1.424                                 | 0.1373                           | 0.548   | 0.586         | 0.078 |
|                                         | right | 1563.7                                  | 1.799                                 | 0.1151                           | 0.521   | 0.6044        | 0.074 |
| Fascia dentata <sup>(2)</sup>           | left  | 3763.1                                  | -2.7513                               | -0.0731                          | -0.559  | 0.5786        | 0.08  |
|                                         | right | 4150.6                                  | -7.8443                               | -0.1890                          | -2.081  | 0.0427        | 0.285 |
| G. cinguli <sup>(10)</sup>              | left  | 21704.1                                 | -46.1828                              | -0.2128                          | -1.825  | 0.074         | 0.252 |
|                                         | right | 21569.2                                 | -80.7096                              | -0.3742                          | -3.477  | <b>0.0011</b> | 0.445 |
| G. frontalis inf. <sup>(10)</sup>       | left  | 21983.1                                 | -57.2715                              | -0.2605                          | -2.095  | <b>0.0414</b> | 0.287 |
|                                         | right | 17518.8                                 | -39.9141                              | -0.2278                          | -1.655  | 0.1044        | 0.23  |
| G. frontalis med. <sup>(10)</sup>       | left  | 23349.7                                 | -66.1401                              | -0.2833                          | -2.271  | <b>0.0276</b> | 0.309 |
|                                         | right | 29572.4                                 | -75.2546                              | -0.2545                          | -2.147  | <b>0.0368</b> | 0.293 |
| G. frontalis sup. <sup>(10)</sup>       | left  | 44980.1                                 | -58.4442                              | -0.1299                          | -1.12   | 0.268         | 0.158 |
|                                         | right | 58935.6                                 | -84.5173                              | -0.1434                          | -1.229  | 0.2249        | 0.173 |
| G. frontoorbitalis lat. <sup>(10)</sup> | left  | 7599.4                                  | -26.317                               | -0.3463                          | -2.399  | <b>0.0203</b> | 0.324 |
|                                         | right | 8841.2                                  | -24.0131                              | -0.2716                          | -1.914  | 0.0615        | 0.264 |
| G. frontoorbitalis med. <sup>(10)</sup> | left  | 9202.0                                  | -35.3023                              | -0.3836                          | -3.29   | <b>0.0019</b> | 0.425 |
|                                         | right | 11359.8                                 | -36.6049                              | -0.3222                          | -2.769  | <b>0.0079</b> | 0.368 |
| G. fusiformis <sup>(10)</sup>           | left  | 15352.6                                 | 1.8377                                | 0.0120                           | 0.092   | 0.9274        | 0.013 |

**Supplemental table 2:** Results of linear regression of anatomical ROI-volumes (**volume data adjusted by skull size**), depending on age

Reference image = MNI single subject template

| Region                               | Side  | Volume offset (20 y) [mm <sup>3</sup> ] | Volume slope [mm <sup>3</sup> / year] | relative Volume slope [% / year] | t-Value | P             | R     |
|--------------------------------------|-------|-----------------------------------------|---------------------------------------|----------------------------------|---------|---------------|-------|
|                                      | right | 14429.9                                 | 0.0394                                | 0.0003                           | 0.002   | 0.9982        | 0.000 |
| G. lingualis <sup>(10)</sup>         | left  | 12414.6                                 | -7.2545                               | -0.0584                          | -0.321  | 0.7499        | 0.046 |
|                                      | right | 13442.7                                 | -8.7453                               | -0.0651                          | -0.433  | 0.667         | 0.062 |
| G. occipitalis inf. <sup>(10)</sup>  | left  | 6312.9                                  | -5.2687                               | -0.0835                          | -0.345  | 0.7318        | 0.049 |
|                                      | right | 15122.0                                 | -30.6772                              | -0.2029                          | -1.099  | 0.2772        | 0.155 |
| G. occipitalis med. <sup>(10)</sup>  | left  | 8984.6                                  | -2.4954                               | -0.0278                          | -0.191  | 0.8492        | 0.027 |
|                                      | right | 6431.8                                  | -4.2435                               | -0.0660                          | -0.366  | 0.7158        | 0.052 |
| G. occipitalis sup. <sup>(10)</sup>  | left  | 7828.1                                  | 4.5277                                | 0.0578                           | 0.442   | 0.6603        | 0.063 |
|                                      | right | 7323.8                                  | 11.3984                               | 0.1556                           | 0.846   | 0.4014        | 0.12  |
| G. parahippocampalis <sup>(10)</sup> | left  | 2557.3                                  | 3.5712                                | 0.1396                           | 1.025   | 0.3105        | 0.145 |
|                                      | right | 3371.3                                  | 4.8805                                | 0.1448                           | 1.173   | 0.2463        | 0.165 |
| G. postcentralis <sup>(10)</sup>     | left  | 28883.5                                 | -50.0624                              | -0.1733                          | -1.236  | 0.2225        | 0.174 |
|                                      | right | 20914.7                                 | -38.0394                              | -0.1819                          | -1.384  | 0.1727        | 0.194 |
| G. precentralis <sup>(10)</sup>      | left  | 25626.5                                 | -24.2402                              | -0.0946                          | -0.68   | 0.4995        | 0.097 |
|                                      | right | 20360.8                                 | -18.2337                              | -0.0896                          | -0.587  | 0.5596        | 0.084 |
| G. rectus <sup>(10)</sup>            | left  | 5620.9                                  | -20.3736                              | -0.3625                          | -2.065  | <b>0.0442</b> | 0.283 |
|                                      | right | 5686.9                                  | -22.0824                              | -0.3883                          | -2.866  | <b>0.0061</b> | 0.379 |
| G. supramarginalis <sup>(10)</sup>   | left  | 23239.9                                 | -69.0177                              | -0.2970                          | -2.11   | <b>0.0400</b> | 0.289 |
|                                      | right | 18431.3                                 | -38.0395                              | -0.2064                          | -1.494  | 0.1417        | 0.209 |
| G. temporalis inf. <sup>(10)</sup>   | left  | 15613.8                                 | -1.4602                               | -0.0094                          | -0.066  | 0.9475        | 0.009 |

**Supplemental table 2:** Results of linear regression of anatomical ROI-volumes (**volume data adjusted by skull size**), depending on age

Reference image = MNI single subject template

| Region                                  | Side  | Volume offset (20 y) [mm <sup>3</sup> ] | Volume slope [mm <sup>3</sup> / year] | relative Volume slope [% / year] | t-Value | P      | R     |
|-----------------------------------------|-------|-----------------------------------------|---------------------------------------|----------------------------------|---------|--------|-------|
|                                         | right | 13356.8                                 | -4.9414                               | -0.037                           | -0.298  | 0.7667 | 0.043 |
| G. temporalis med. <sup>(10)</sup>      | left  | 22425.2                                 | -19.6766                              | -0.0877                          | -0.689  | 0.4938 | 0.098 |
|                                         | right | 22310.5                                 | -47.7712                              | -0.2141                          | -1.806  | 0.0770 | 0.25  |
| G. temporalis sup. <sup>(10)</sup>      | left  | 29030.0                                 | -32.0456                              | -0.1104                          | -0.952  | 0.3460 | 0.135 |
|                                         | right | 30708.4                                 | -28.3795                              | -0.0924                          | -0.818  | 0.4172 | 0.116 |
| HATA <sup>(2)</sup>                     | left  | 424.2                                   | -1.0463                               | -0.2466                          | -1.709  | 0.0939 | 0.237 |
|                                         | right | 312.7                                   | -0.7807                               | -0.2497                          | -1.453  | 0.1525 | 0.203 |
| Hippocampus <sup>(10)</sup>             | left  | 8195.3                                  | -4.1605                               | -0.5080                          | -0.406  | 0.6862 | 0.058 |
|                                         | right | 8571.5                                  | -11.257                               | -0.1313                          | -1.414  | 0.1638 | 0.198 |
| IML <sup>(10)</sup>                     | left  | 304.9                                   | -0.4523                               | -0.1483                          | -0.749  | 0.4575 | 0.106 |
|                                         | right | 343.4                                   | -0.5325                               | -0.1551                          | -0.735  | 0.4660 | 0.104 |
| Insula <sup>(10)</sup>                  | left  | 7580.7                                  | -15.1497                              | -0.1998                          | -1.782  | 0.0809 | 0.247 |
|                                         | right | 8440.0                                  | -23.2375                              | -0.2753                          | -1.68   | 0.0994 | 0.233 |
| LD <sup>(10)</sup>                      | left  | 111.6                                   | 0.2616                                | 0.2345                           | 0.668   | 0.5075 | 0.095 |
|                                         | right | 143.8                                   | -0.2595                               | -0.1805                          | -0.642  | 0.5238 | 0.091 |
| Lobulus parietalis inf. <sup>(10)</sup> | left  | 15644.0                                 | -29.6996                              | -0.1898                          | -1.341  | 0.1861 | 0.188 |
|                                         | right | 12463.7                                 | -23.9831                              | -0.1924                          | -1.37   | 0.1768 | 0.192 |
| Lobulus parietalis sup. <sup>(10)</sup> | left  | 17751.4                                 | -21.7291                              | -0.1224                          | -0.859  | 0.3946 | 0.122 |
|                                         | right | 17892.5                                 | -51.8637                              | -0.2899                          | -1.961  | 0.0556 | 0.27  |
| LP <sup>(10)</sup>                      | left  | 629.5                                   | -1.5142                               | -0.2405                          | -1.456  | 0.1517 | 0.204 |

**Supplemental table 2:** Results of linear regression of anatomical ROI-volumes (**volume data adjusted by skull size**), depending on age

Reference image = MNI single subject template

| Region                                 | Side  | Volume offset (20 y) [mm <sup>3</sup> ] | Volume slope [mm <sup>3</sup> / year] | relative Volume slope [% / year] | t-Value | P             | R     |
|----------------------------------------|-------|-----------------------------------------|---------------------------------------|----------------------------------|---------|---------------|-------|
|                                        | right | 720.4                                   | -2.6443                               | -0.3671                          | -2.512  | 0.0153        | 0.338 |
| MD <sup>(10)</sup>                     | left  | 254.9                                   | 1.2136                                | 0.4762                           | 1.548   | 0.1280        | 0.216 |
|                                        | right | 282.8                                   | 1.1600                                | 0.4101                           | 1.44    | 0.1562        | 0.201 |
| Medulla <sup>(10)</sup>                | mid   | 2820.1                                  | -6.9495                               | -0.2464                          | -1.471  | 0.1478        | 0.206 |
| Ncl. caudatus <sup>(10)</sup>          | left  | 5359.6                                  | -5.2233                               | -0.0975                          | -0.617  | 0.5400        | 0.088 |
|                                        | right | 5322.9                                  | -3.5602                               | -0.0669                          | -0.428  | 0.6706        | 0.061 |
| Ncl. paraventricularis <sup>(10)</sup> | left  | 33.6                                    | 0.0559                                | 0.1664                           | 0.731   | 0.4682        | 0.104 |
|                                        | right | 32.2                                    | -0.0136                               | -0.0423                          | -0.181  | 0.8568        | 0.026 |
| Ncl. ruber <sup>(10)</sup>             | left  | 612.5                                   | -1.3807                               | -0.2254                          | -1.32   | 0.1929        | 0.185 |
|                                        | right | 585.9                                   | -2.3012                               | -0.3927                          | -2.468  | <b>0.0171</b> | 0.333 |
| PU <sup>(10)</sup>                     | left  | 966.4                                   | 0.5826                                | 0.0603                           | 0.432   | 0.6673        | 0.062 |
|                                        | right | 1003.7                                  | 0.5399                                | 0.0538                           | 0.307   | 0.7604        | 0.044 |
| Pallidum pars ext. <sup>(10)</sup>     | left  | 1476.3                                  | 0.7814                                | 0.0529                           | 0.299   | 0.7663        | 0.043 |
|                                        | right | 1446.6                                  | 2.4221                                | 0.1674                           | 0.765   | 0.4482        | 0.109 |
| Pallidum pars int. <sup>(10)</sup>     | left  | 450.2                                   | -0.2329                               | -0.0517                          | -0.258  | 0.7972        | 0.037 |
|                                        | right | 546.2                                   | 1.0882                                | 0.1992                           | 0.802   | 0.4265        | 0.114 |
| Pons <sup>(10)</sup>                   | mid   | 17736.0                                 | -41.7160                              | -0.2352                          | -1.488  | 0.1433        | 0.208 |
| Precuneus <sup>(10)</sup>              | left  | 11242.5                                 | -3.2028                               | -0.0285                          | -0.222  | 0.8254        | 0.032 |
|                                        | right | 15189.1                                 | 8.7211                                | 0.0574                           | 0.409   | 0.6840        | 0.058 |
| Putamen <sup>(10)</sup>                | left  | 5249.6                                  | -12.8529                              | -0.2448                          | -2.088  | <b>0.0420</b> | 0.286 |

**Supplemental table 2:** Results of linear regression of anatomical ROI-volumes (**volume data adjusted by skull size**), depending on age

Reference image = MNI single subject template

| Region                            | Side  | Volume offset (20 y) [mm <sup>3</sup> ] | Volume slope [mm <sup>3</sup> / year] | relative Volume slope [% / year] | t-Value | P             | R     |
|-----------------------------------|-------|-----------------------------------------|---------------------------------------|----------------------------------|---------|---------------|-------|
|                                   | right | 5409.5                                  | -9.3655                               | -0.1731                          | -1.394  | 0.1696        | 0.195 |
| SII Op1 <sup>(9)</sup>            | left  | 6845.3                                  | -10.7146                              | -0.1565                          | -0.906  | 0.3695        | 0.128 |
|                                   | right | 4782.0                                  | -3.658                                | -0.0765                          | -0.461  | 0.6466        | 0.066 |
| SII Op2 <sup>(9)</sup>            | left  | 1605.3                                  | -4.8303                               | -0.3009                          | -1.721  | 0.0916        | 0.239 |
|                                   | right | 2168.0                                  | -5.1332                               | -0.2368                          | -1.41   | 0.1650        | 0.197 |
| SII Op3 <sup>(9)</sup>            | left  | 3120.2                                  | -7.6746                               | -0.2460                          | -1.626  | 0.1105        | 0.226 |
|                                   | right | 4558.3                                  | -10.6471                              | -0.2336                          | -1.638  | 0.1079        | 0.228 |
| SII Op4 <sup>(9)</sup>            | left  | 5072.7                                  | -8.2179                               | -0.1620                          | -0.956  | 0.3440        | 0.135 |
|                                   | right | 4562.5                                  | -5.8135                               | -0.1274                          | -0.67   | 0.5060        | 0.095 |
| Subcallosal area <sup>(10)</sup>  | left  | 939.1                                   | -4.5841                               | -0.4881                          | -2.929  | <b>0.0052</b> | 0.386 |
|                                   | right | 913.2                                   | -2.7391                               | -0.3000                          | -1.656  | 0.1041        | 0.23  |
| Subiculum <sup>(10)</sup>         | left  | 6191.5                                  | 3.0986                                | 0.0500                           | 0.346   | 0.7310        | 0.049 |
|                                   | right | 6466.0                                  | 0.1743                                | 0.0027                           | 0.023   | 0.9814        | 0.003 |
| Substantia grisea <sup>(10)</sup> | mid   | 120.7                                   | -0.1433                               | -0.1187                          | -0.637  | 0.5268        | 0.091 |
| Thalamus <sup>(10)</sup>          | left  | 6118.3                                  | -16.6095                              | -0.2715                          | -2.372  | 0.0217        | 0.321 |
|                                   | right | 5991.4                                  | -20.152                               | -0.3363                          | -2.904  | 0.0055        | 0.383 |
|                                   | right | 1362.8                                  | -1.5598                               | -0.1145                          | -0.546  | 0.5876        | 0.078 |
| VA <sup>(10)</sup>                | left  | 1134.1                                  | -5.0852                               | -0.4484                          | -2.999  | <b>0.0042</b> | 0.394 |
|                                   | right | 1092.0                                  | -5.698                                | -0.5218                          | -3.736  | <b>0.0005</b> | 0.471 |
| Ventricle 3 <sup>(10)</sup>       | mid   | 510.2                                   | 10.9448                               | 2.1450                           | 5.041   | <b>0.0000</b> | 0.584 |

**Supplemental table 2:** Results of linear regression of anatomical ROI-volumes (**volume data adjusted by skull size**), depending on age

Reference image = MNI single subject template

---

| Region                      | Side  | Volume offset (20 y) [mm <sup>3</sup> ] | Volume slope [mm <sup>3</sup> / year] | relative Volume slope [% / year] | t-Value | P             | R     |
|-----------------------------|-------|-----------------------------------------|---------------------------------------|----------------------------------|---------|---------------|-------|
| Ventricle 4 <sup>(10)</sup> | mid   | 685.3                                   | 8.718                                 | 1.2722                           | 2.969   | <b>0.0046</b> | 0.39  |
| Ventricle lat.              | left  | 4874.1                                  | 85.5122                               | 1.7544                           | 2.146   | <b>0.0368</b> | 0.293 |
|                             | right | 4291.5                                  | 71.724                                | 1.6713                           | 1.839   | 0.0719        | 0.254 |
| Ventricle total             | left  | 8113.7                                  | 112.341                               | 1.3846                           | 2.339   | <b>0.0234</b> | 0.317 |
|                             | right | 8057.2                                  | 110.5764                              | 1.3724                           | 2.19    | <b>0.0333</b> | 0.299 |
| VL <sup>(10)</sup>          | left  | 1529.1                                  | -7.9648                               | -0.5209                          | -3.777  | <b>0.0004</b> | 0.475 |
|                             | right | 1589.0                                  | -9.7043                               | -0.6107                          | -4.608  | <b>0.0000</b> | 0.55  |
| VPL <sup>(10)</sup>         | left  | 710.9                                   | -3.0441                               | -0.4282                          | -2.834  | <b>0.0067</b> | 0.375 |
|                             | right | 440.4                                   | -2.2247                               | -0.5052                          | -3.553  | <b>0.0009</b> | 0.453 |

**Supplemental table 3:** Clusters of significant age-related volume decline, determined by voxel-wise linear regression of the local volume ratio, depending on age (**native volume data, without adjustment**); Reference image = MNI single subject template

Mean t-value within each cluster; cluster volume in mm<sup>3</sup>; X<sub>min</sub>, X<sub>max</sub> etc. = extent coordinates in mm of each cluster, related to the MNI single subject template; overlaps of each cluster with anatomical ROI's: In parentheses relative overlapping volume (in percent) of the cluster and of the ROI (e.g. le. Putamen (45/18) means: 45 % of the cluster is overlapping with the left putamen, and 18 % of the left putamen is overlapping with the cluster).

The threshold for the definition of the clusters within the t-value map corresponds to a significance level of p<0.01 (for a two-sided t-test).

Abbreviations are explained in appendix D.

Only clusters larger than 1000 mm<sup>3</sup> are presented. Note that macroanatomical and cytoarchitectonical areas in part overlap with each other.

| Mean t-Value | Volume | X <sub>min</sub> | X <sub>max</sub> | Y <sub>min</sub> | Y <sub>max</sub> | Z <sub>min</sub> | Z <sub>max</sub> | Overlaps                                                                                                                                                                                                           |
|--------------|--------|------------------|------------------|------------------|------------------|------------------|------------------|--------------------------------------------------------------------------------------------------------------------------------------------------------------------------------------------------------------------|
| 3.285        | 5664   | -16              | 20               | -70              | -44              | -40              | -8               | <b>Cerebellum -</b><br>- <b>left hemisphere:</b> WM (29.52/11.81), Lobus ant. (10.59/4.76);<br>- <b>right hemisphere</b> WM (20.90/7.69), Lobus ant. (10.31/7.06), Lobus post. (8.19/0.74);<br>Vermis (18.36/7.83) |
| 3.095        | 4992   | -46              | -16              | -78              | -44              | -52              | -24              | <b>left Cerebellum:</b> WM (23.08/7.67), Lobus ant. (15.54/6.09), Lobus post. (61.06/4.86)                                                                                                                         |
| 3.245        | 4824   | -8               | 14               | 10               | 56               | -12              | 38               | le. G. cinguli (42.12/6.75), ri. G. cinguli (54.23/10.09)                                                                                                                                                          |
| 3.508        | 4608   | 6                | 26               | -32              | -6               | -8               | 18               | <b>right Thalamus:</b> Total (59.38/36.97), VA (14.76/61.24), VL (27.78/85.27), LP (7.29/39.39), CM (0.17/5.45), VPL (6.42/51.38),<br><b>other regions:</b> ri. CST (28.47/7.71), ri. WM (39.58/0.87)              |
| 3.333        | 4312   | 4                | 32               | -54              | -22              | 32               | 72               | ri. Area 2 (14.47/5.67), ri. Fiber CST (10.02/2.49), ri. Lobulus parietalis sup.                                                                                                                                   |



**Supplemental table 3:** Clusters of significant age-related volume decline, determined by voxel-wise linear regression of the local volume ratio, depending on age (**native volume data, without adjustment**); Reference image = MNI single subject template

| Mean t-Value | Volume | X <sub>min</sub> | X <sub>max</sub> | Y <sub>min</sub> | Y <sub>max</sub> | Z <sub>min</sub> | Z <sub>max</sub> | Overlaps                                                                                                                                                                                                                                  |
|--------------|--------|------------------|------------------|------------------|------------------|------------------|------------------|-------------------------------------------------------------------------------------------------------------------------------------------------------------------------------------------------------------------------------------------|
|              |        |                  |                  |                  |                  |                  |                  | (21.15/4.08), ri. G. cinguli (11.13/1.79), ri. G. postcentralis (19.67/3.32), ri. WM (43.41/0.89)                                                                                                                                         |
| 3.15         | 4048   | -18              | 18               | 6                | 58               | -28              | -4               | le. G. frontoorbitalis med. (13.04/4.62), ri. G. frontoorbitalis med. (12.25/4.60), le. G. rectus (23.52/14.74), ri. G. rectus (19.57/12.55), le. Subcallosal area (2.96/12.16), le. Ncl caudatus (9.49/6.28)                             |
| 3.269        | 3976   | -28              | -6               | -34              | -4               | -6               | 18               | <b>left Thalamus:</b> Total (54.53/26.52), ANT (0.20/6.90), VA (14.08/49.98), VL (27.57/73.31), LP (3.82/21.54), VPL (6.64/32.05), Lamina medullaris med. (0.80/5.31);<br><b>other regions:</b> le. CST (35.61/7.43), le. WM (45.07/0.80) |
| 3.081        | 3392   | 18               | 48               | -78              | -48              | -44              | -26              | <b>right Cerebellum:</b> WM (8.25/1.94), Lobus post. (91.75/4.34)                                                                                                                                                                         |
| 3.204        | 2472   | 6                | 44               | -68              | -54              | 30               | 66               | ri. Lobulus parietalis sup. (35.92/4.61), ri. Lobulus parietalis inf. (11.33/2.09), ri. WM (48.22/0.53)                                                                                                                                   |
| 3.275        | 1488   | 12               | 30               | 42               | 66               | 14               | 38               | ri. G. frontalis sup. (71.51/1.60), ri. G. frontalis med. (20.43/0.85)                                                                                                                                                                    |
| 3.314        | 1288   | 32               | 40               | -20              | 0                | -6               | 14               | ri. SII Op3 (6.21/1.97), ri. Insula (39.75/5.23), ri. Putamen (14.29/1.61), ri. WM (45.96/0.28)                                                                                                                                           |
| 3.246        | 1152   | 56               | 68               | -62              | -36              | -6               | 8                | ri. G. occipitalis inf. (6.25/0.33), ri. G. temporalis med. (86.81/3.92), ri. WM (5.56/0.02)                                                                                                                                              |
| 3.279        | 1096   | -32              | -12              | -48              | -36              | 44               | 62               | le. Area 2 (19.71/1.56), le. Area 1 (6.57/0.42), le. Lobulus parietalis sup. (21.90/1.20), le. G. cinguli (12.41/0.47), le. G. postcentralis (28.47/0.90), le. WM (35.04/0.18)                                                            |
| 2.994        | 1072   | -16              | 8                | -40              | -24              | -46              | -32              | Pons (99.25/4.94)                                                                                                                                                                                                                         |
| 3.13         | 1000   | -40              | -24              | -8               | 8                | -6               | 18               | le. SII Op3 (16.00/4.08), le. Insula (16.80/1.78), le. Putamen (28.80/4.43), le. WM                                                                                                                                                       |

**Supplemental table 3:** Clusters of significant age-related volume decline, determined by voxel-wise linear regression of the local volume ratio, depending on age (**native volume data, without adjustment**); Reference image = MNI single subject template

| Mean t-Value | Volume | X <sub>min</sub> | X <sub>max</sub> | Y <sub>min</sub> | Y <sub>max</sub> | Z <sub>min</sub> | Z <sub>max</sub> | Overlaps                                                                                                                                               |
|--------------|--------|------------------|------------------|------------------|------------------|------------------|------------------|--------------------------------------------------------------------------------------------------------------------------------------------------------|
|              |        |                  |                  |                  |                  |                  |                  | (48.00/0.22)                                                                                                                                           |
| 3.549        | 928    | -48              | -36              | 38               | 54               | 18               | 30               | le. G. frontalis med. (59.48/2.13), le. WM (18.10/0.07)                                                                                                |
| 3.082        | 832    | -46              | -28              | -66              | -48              | 30               | 52               | le. Lobulus parietalis sup. (18.27/0.59), le. Lobulus parietalis inf. (27.88/1.28), le. G. supramarginalis (38.46/1.34), le. WM (13.46/0.06)           |
| 3.097        | 816    | -48              | -36              | 46               | 62               | -14              | 10               | le. G. frontalis med. (9.80/0.39), le. G. frontoorbitalis lat. (33.33/3.43)                                                                            |
| 3.361        | 728    | -38              | -28              | 16               | 30               | -10              | 4                | le. G. frontalis inf. (16.48/0.54), le. Insula (60.44/4.55)                                                                                            |
| 3.242        | 696    | 22               | 40               | -10              | 0                | 46               | 64               | ri. Area 6 (52.87/0.86), ri. G. frontalis sup. (40.23/0.45), ri. G. frontalis med. (32.18/0.73), ri. WM (24.14/0.07)                                   |
| 3.11         | 688    | 20               | 34               | 18               | 34               | 36               | 50               | ri. G. frontalis sup. (47.67/0.47), ri. G. frontalis med. (50.00/1.02)                                                                                 |
| 3.248        | 640    | -58              | -46              | -56              | -36              | 26               | 34               | le. Lobulus parietalis inf. (16.25/0.69), le. G. temporalis sup. (12.50/0.22), le. G. supramarginalis (66.25/1.69)                                     |
| 3.095        | 600    | -16              | -6               | 50               | 60               | 26               | 44               | le. G. frontalis sup. (64.00/0.74)                                                                                                                     |
| 3.275        | 584    | -30              | -22              | 42               | 54               | 24               | 34               | le. G. frontalis sup. (20.55/0.30), le. G. frontalis med. (58.90/1.34)                                                                                 |
| 3.177        | 568    | -22              | -14              | -78              | -64              | 32               | 50               | le. Lobulus parietalis sup. (26.76/0.80), le. Precuneus (32.39/1.21), le. WM (33.80/0.09)                                                              |
| 3.306        | 520    | 40               | 48               | 48               | 58               | 0                | 14               | ri. G. frontalis med. (69.23/1.08)                                                                                                                     |
| 3.062        | 304    | 4                | 8                | -18              | -8               | 34               | 44               | ri. Area 6 (5.26/0.05), ri. G. cinguli (78.95/0.86), ri. WM (21.05/0.04)                                                                               |
| 3.026        | 256    | -50              | -38              | -40              | -36              | 36               | 46               | le. G. supramarginalis (96.88/0.91)                                                                                                                    |
| 3.159        | 256    | -36              | -24              | -6               | 2                | 48               | 54               | le. Area 6 (25.00/0.13), le. G. frontalis sup. (28.12/0.20), le. G. frontalis med. (15.62/0.15), le. G. precentralis (34.38/0.21), le. WM (18.75/0.02) |
| 2.953        | 248    | 36               | 46               | -46              | -36              | -58              | -52              | ri. Cerebellum Lobus post (6.45/0.04)                                                                                                                  |
| 2.91         | 248    | -44              | -38              | -46              | -38              | -2               | 6                | le. WM (100.00/0.11)                                                                                                                                   |

**Supplemental table 3:** Clusters of significant age-related volume decline, determined by voxel-wise linear regression of the local volume ratio, depending on age (**native volume data, without adjustment**); Reference image = MNI single subject template

| Mean t-Value | Volume | X <sub>min</sub> | X <sub>max</sub> | Y <sub>min</sub> | Y <sub>max</sub> | Z <sub>min</sub> | Z <sub>max</sub> | Overlaps                                                                                                                           |
|--------------|--------|------------------|------------------|------------------|------------------|------------------|------------------|------------------------------------------------------------------------------------------------------------------------------------|
| 3.15         | 232    | -10              | -4               | -14              | -8               | 56               | 66               | le. Area 6 (100.00/0.56), le. G. frontalis sup. (51.72/0.25), le. G. precentralis (31.03/0.23), le. WM (17.24/0.02)                |
| 2.98         | 224    | -10              | 2                | -28              | -22              | -22              | -18              | le. Brainstem (25.00/1.65), Pons (75.00/0.64)                                                                                      |
| 3.281        | 216    | 24               | 32               | 54               | 60               | -2               | 2                | ri. G. frontalis sup. (40.74/0.14), ri. G. frontalis med. (33.33/0.20)                                                             |
| 3.026        | 216    | -48              | -38              | -60              | -52              | 14               | 24               | le. G. temporalis sup. (40.74/0.22), le. G. temporalis med. (14.81/0.09), le. G. supramarginalis (11.11/0.12), le. WM (29.63/0.03) |
| 3.019        | 216    | 4                | 10               | -6               | 2                | 34               | 44               | ri. Area 6 (22.22/0.10), ri. G. cinguli (92.59/0.80), ri. WM (7.41/0.00)                                                           |
| 3.078        | 184    | -14              | -8               | -26              | -18              | 40               | 46               | le. G. cinguli (65.22/0.40), le. WM (30.43/0.02)                                                                                   |
| 3.068        | 184    | -26              | -22              | 22               | 28               | 44               | 50               | le. G. frontalis sup. (13.04/0.07), le. G. frontalis med. (78.26/0.49)                                                             |
| 2.808        | 176    | 16               | 20               | -54              | -44              | -58              | -52              | ri. Cerebellum Lobus post (100.00/0.30)                                                                                            |
| 3.148        | 176    | 32               | 36               | 16               | 20               | 0                | 6                | ri. Insula (100.00/1.74)                                                                                                           |
| 2.97         | 176    | 8                | 14               | -16              | -10              | 50               | 56               | ri. Area 6 (54.55/0.25), ri. G. frontalis sup. (31.82/0.10), ri. WM (63.64/0.05)                                                   |
| 2.909        | 168    | 34               | 42               | -84              | -76              | 10               | 12               | ri. G. occipitalis inf. (66.67/0.48), ri. WM (33.33/0.03)                                                                          |
| 3.231        | 160    | 2                | 6                | -24              | -20              | -16              | -10              | ri. Ncl. ruber (70.00/20.37), ri. Brainstem (30.00/0.80)                                                                           |
| 3.021        | 160    | -10              | -6               | -62              | -56              | 16               | 22               | le. Precuneus (100.00/1.15)                                                                                                        |
| 2.799        | 152    | 34               | 48               | 26               | 28               | -4               | 2                | ri. Area 45 (5.26/0.20), ri. G. frontoorbitalis lat. (100.00/1.51)                                                                 |
| 2.886        | 152    | 6                | 14               | -54              | -50              | 34               | 38               | ri. G. cinguli (47.37/0.19), ri. Precuneus (42.11/0.36), ri. WM (10.53/0.01)                                                       |
| 3.055        | 136    | -34              | -30              | 32               | 36               | 34               | 40               | le. G. frontalis med. (94.12/0.59)                                                                                                 |
| 3.018        | 128    | 34               | 38               | 20               | 24               | -14              | -8               | ri. G. frontoorbitalis med. (87.50/0.76), ri. Insula (12.50/0.19)                                                                  |
| 2.94         | 128    | -56              | -42              | 34               | 40               | 0                | 6                | le. Area 45 (62.50/0.86), le. G. frontalis inf. (93.75/0.50), le. WM (6.25/0.00)                                                   |
| 2.851        | 120    | -22              | -20              | -86              | -82              | -4               | 4                | le. WM (100.00/0.05)                                                                                                               |
| 2.93         | 120    | 42               | 48               | -28              | -26              | 46               | 52               | ri. Area 2 (80.00/0.92), ri. Area 1 (13.33/0.14), ri. Area 3a (40.00/0.51), ri. Area 3b                                            |

**Supplemental table 3:** Clusters of significant age-related volume decline, determined by voxel-wise linear regression of the local volume ratio, depending on age (**native volume data, without adjustment**); Reference image = MNI single subject template

| Mean t-Value | Volume | X <sub>min</sub> | X <sub>max</sub> | Y <sub>min</sub> | Y <sub>max</sub> | Z <sub>min</sub> | Z <sub>max</sub> | Overlaps                                                                                                                                                                           |
|--------------|--------|------------------|------------------|------------------|------------------|------------------|------------------|------------------------------------------------------------------------------------------------------------------------------------------------------------------------------------|
|              |        |                  |                  |                  |                  |                  |                  | (86.67/0.55), ri. G. postcentralis (13.33/0.07), ri. WM (86.67/0.05)                                                                                                               |
| 3.121        | 112    | -6               | -4               | -10              | -2               | -12              | -6               | le. Brainstem (35.71/0.61), le. WM (64.29/0.03)                                                                                                                                    |
| 3.064        | 112    | 50               | 58               | -54              | -50              | 6                | 12               | ri. G. temporalis sup. (21.43/0.08), ri. G. temporalis med. (71.43/0.29), ri. WM (7.14/0.00)                                                                                       |
| 2.912        | 112    | -14              | -10              | -94              | -90              | 18               | 24               | le. Cuneus (28.57/0.20), le. G. occipitalis sup. (35.71/0.47), le. WM (35.71/0.02)                                                                                                 |
| 2.899        | 112    | -32              | -30              | -74              | -68              | 30               | 34               | le. Lobulus parietalis inf. (92.86/0.64), le. WM (7.14/0.00)                                                                                                                       |
| 3.006        | 112    | 36               | 42               | -38              | -30              | 46               | 52               | ri. Area 2 (92.86/1.17), ri. Area 3b (7.14/0.09), ri. G. postcentralis (71.43/0.32), ri. G. supramarginalis (21.43/0.11), ri. WM (7.14/0.01)                                       |
| 3.008        | 104    | 48               | 56               | -32              | -30              | 40               | 46               | ri. G. supramarginalis (84.62/0.36), ri. WM (15.38/0.00)                                                                                                                           |
| 3.103        | 88     | 32               | 36               | -92              | -90              | 0                | 4                | ri. G. occipitalis inf. (18.18/0.23), ri. WM (81.82/0.03)                                                                                                                          |
| 2.886        | 88     | 22               | 26               | 8                | 12               | 46               | 50               | ri. G. frontalis sup. (36.36/0.03), ri. G. frontalis med. (63.64/0.15)                                                                                                             |
| 2.761        | 80     | -16              | -14              | 50               | 56               | -24              | -20              | le. G. frontoorbitalis med. (20.00/0.30)                                                                                                                                           |
| 2.81         | 80     | 10               | 16               | -32              | -28              | 64               | 70               | ri. CST (90.00/0.44), ri. Area 4a (30.00/0.12), ri. Area 4p (60.00/0.50), ri. Area 6 (10.00/0.01), ri. Area 3a (20.00/0.34), ri. G. precentralis (90.00/0.26), ri. WM (10.00/0.01) |

**Supplemental table 4:** Results of linear regression of anatomical ROI-volumes (**native volume data, without adjustment**), depending on age

Reference image = MNI single subject template

Volume offset = extrapolated ROI volume at age 20 years in mm<sup>3</sup>; volume slope = annualized volume difference in mm<sup>3</sup> / year; relative volume slope = volume slope / volume offset x 100 %; P = p-value, corresponding to the measured t-value; R = correlation; abbreviations are explained in appendix D. Note that macroanatomical and cytoarchitectonical areas in part overlap with each other.

(1-9) Cytoarchitectonically defined areas and fiber tracks: (1) Amunts et al. (1999); (2) Amunts et al. (2005); (3) Geyer et al. (1999); (4) Geyer et al. (1994); (5) Geyer et al. (2004); (6) Rademacher et al. (2001); (7) Buerger et al. (2006); (8) Grefkes et al. (2001); (9) Eickhoff et al. (2006); (10) Macroanatomical labelling of the MNI single subject template (<http://www.loni.ucla.edu/ICBM>);

| Region                  | Side  | Volume offset<br>(20 y) [mm <sup>3</sup> ] | Volume slope<br>[mm <sup>3</sup> / year] | relative Volume<br>slope [% / year] | t-Value | P             | R     |
|-------------------------|-------|--------------------------------------------|------------------------------------------|-------------------------------------|---------|---------------|-------|
| Amygdala <sup>(2)</sup> | left  | 5394.3                                     | -2.0941                                  | -0.0388                             | -0.268  | 0.7899        | 0.038 |
|                         | right | 5068.1                                     | -2.8223                                  | -0.0557                             | -0.474  | 0.6377        | 0.068 |
| ANT <sup>(10)</sup>     | left  | 115.2                                      | -0.2462                                  | -0.2138                             | -0.923  | 0.3604        | 0.131 |
|                         | right | 148.3                                      | -0.0949                                  | -0.064                              | -0.29   | 0.7729        | 0.041 |
| Area 1 <sup>(3)</sup>   | left  | 10527.9                                    | -7.4819                                  | -0.0711                             | -0.392  | 0.6968        | 0.056 |
|                         | right | 8367.9                                     | -2.1176                                  | -0.0253                             | -0.146  | 0.8848        | 0.021 |
| Area 2 <sup>(8)</sup>   | left  | 10465.2                                    | -25.3123                                 | -0.2419                             | -1.708  | 0.0940        | 0.237 |
|                         | right | 7959.7                                     | -25.1243                                 | -0.3156                             | -2.177  | <b>0.0343</b> | 0.297 |
| Area 3a <sup>(3)</sup>  | left  | 5873.1                                     | -9.4634                                  | -0.1611                             | -1.082  | 0.2845        | 0.153 |
|                         | right | 5941.2                                     | -17.4851                                 | -0.2943                             | -1.959  | 0.0558        | 0.27  |
| Area 3b <sup>(3)</sup>  | left  | 12124.6                                    | -11.6519                                 | -0.0961                             | -0.626  | 0.5344        | 0.089 |
|                         | right | 13414.1                                    | -22.5672                                 | -0.1682                             | -1.14   | 0.2597        | 0.161 |

**Supplemental table 4:** Results of linear regression of anatomical ROI-volumes (**native volume data, without adjustment**), depending on age

Reference image = MNI single subject template

| Region                     | Side  | Volume offset<br>(20 y) [mm <sup>3</sup> ] | Volume slope<br>[mm <sup>3</sup> / year] | relative Volume<br>slope [% / year] | t-Value | P             | R     |
|----------------------------|-------|--------------------------------------------|------------------------------------------|-------------------------------------|---------|---------------|-------|
| Area 44 <sup>(1)</sup>     | left  | 10297.6                                    | -35.0668                                 | -0.3405                             | -2.308  | <b>0.0253</b> | 0.313 |
|                            | right | 7073.1                                     | -13.131                                  | -0.1856                             | -1.007  | 0.3187        | 0.142 |
| Area 45 <sup>(1)</sup>     | left  | 9140.0                                     | -24.1413                                 | -0.2641                             | -1.867  | 0.0679        | 0.258 |
|                            | right | 8320.8                                     | -18.4185                                 | -0.2214                             | -1.197  | 0.2370        | 0.169 |
| Area 4a <sup>(4)</sup>     | left  | 15031.7                                    | 10.9929                                  | 0.0731                              | 0.396   | 0.6935        | 0.057 |
|                            | right | 13212.1                                    | -2.0225                                  | -0.0153                             | -0.079  | 0.9371        | 0.011 |
| Area 4p <sup>(4)</sup>     | left  | 8340.2                                     | -0.5919                                  | -0.0071                             | -0.048  | 0.9616        | 0.007 |
|                            | right | 8818.0                                     | -17.1027                                 | -0.194                              | -1.172  | 0.2469        | 0.165 |
| Area 6 <sup>(5)</sup>      | left  | 33981.3                                    | 4.4049                                   | 0.013                               | 0.085   | 0.9328        | 0.012 |
|                            | right | 34781.7                                    | -14.7924                                 | -0.0425                             | -0.279  | 0.7817        | 0.04  |
| Brain                      | both  | 1514621.3                                  | -2053.8986                               | -0.1356                             | -1.329  | 0.1901        | 0.186 |
|                            | left  | 760606.6                                   | -987.3277                                | -0.1298                             | -1.263  | 0.2124        | 0.178 |
|                            | right | 775638.5                                   | -1030.7529                               | -0.1329                             | -1.302  | 0.1991        | 0.183 |
| Brainstem <sup>(10)</sup>  | left  | 4466.6                                     | -1.3918                                  | -0.0312                             | -0.248  | 0.805         | 0.035 |
|                            | right | 4610.7                                     | -4.5561                                  | -0.0988                             | -0.746  | 0.4594        | 0.106 |
| Cerebellum <sup>(10)</sup> | left  | 80456.3                                    | -243.7761                                | -0.303                              | -2.265  | <b>0.0280</b> | 0.308 |
|                            | right | 78376.6                                    | -190.1784                                | -0.2426                             | -1.898  | 0.0636        | 0.262 |
| Cerebellum Lobus ant.      | left  | 9879.6                                     | -21.3038                                 | -0.2156                             | -1.515  | 0.1362        | 0.212 |
|                            | right | 6191.3                                     | -2.7167                                  | -0.0439                             | -0.317  | 0.7522        | 0.045 |
| Cerebellum Lobus post.     | left  | 51372                                      | -87.8289                                 | -0.171                              | -1.247  | 0.2181        | 0.175 |
|                            | right | 56277.5                                    | -124.2053                                | -0.2207                             | -1.676  | 0.1002        | 0.233 |

**Supplemental table 4:** Results of linear regression of anatomical ROI-volumes (**native volume data, without adjustment**), depending on age

Reference image = MNI single subject template

| Region                                | Side  | Volume offset<br>(20 y) [mm <sup>3</sup> ] | Volume slope<br>[mm <sup>3</sup> / year] | relative Volume<br>slope [% / year] | t-Value | P             | R     |
|---------------------------------------|-------|--------------------------------------------|------------------------------------------|-------------------------------------|---------|---------------|-------|
| Cerebellum Vermis                     | mid   | 9695.3                                     | -6.5521                                  | -0.0676                             | -0.541  | 0.5913        | 0.077 |
| Cerebellum WM                         | left  | 17942.1                                    | -125.3784                                | -0.6988                             | -2.774  | <b>0.0078</b> | 0.368 |
|                                       | right | 14626.9                                    | -64.7508                                 | -0.4427                             | -2.161  | <b>0.0356</b> | 0.295 |
| Cerebellum Lobus<br>flocculonodularis | left  | 807.9                                      | -1.5596                                  | -0.1931                             | -1.211  | 0.2318        | 0.17  |
|                                       | right | 584.0                                      | -0.9415                                  | -0.1612                             | -1.112  | 0.2717        | 0.157 |
| Cerebrum WM <sup>(10)</sup>           | left  | 175862.2                                   | -233.5955                                | -0.1328                             | -1.2    | 0.2360        | 0.169 |
|                                       | right | 178143.5                                   | -231.8075                                | -0.1301                             | -1.002  | 0.3214        | 0.142 |
| CGM <sup>(10)</sup>                   | left  | 116.6                                      | -0.2797                                  | -0.2399                             | -1.461  | 0.1505        | 0.204 |
|                                       | right | 84.8                                       | -0.2145                                  | -0.2529                             | -1.425  | 0.1606        | 0.199 |
| CM <sup>(10)</sup>                    | left  | 62.5                                       | 0.1031                                   | 0.1649                              | 0.861   | 0.3934        | 0.122 |
|                                       | right | 57.8                                       | -0.2216                                  | -0.3837                             | -1.568  | 0.1233        | 0.219 |
| Cornu ammonis <sup>(2)</sup>          | left  | 8077.8                                     | -2.3274                                  | -0.0288                             | -0.237  | 0.8140        | 0.034 |
|                                       | right | 8247                                       | -8.4056                                  | -0.1019                             | -0.933  | 0.3555        | 0.132 |
| Corpus mamillare <sup>(10)</sup>      | left  | 56.1                                       | 0.1724                                   | 0.3074                              | 1.297   | 0.2009        | 0.182 |
|                                       | right | 44.3                                       | 0.2114                                   | 0.4774                              | 1.773   | 0.0825        | 0.246 |
| Corticospinal tract <sup>(6)</sup>    | left  | 16293.1                                    | -32.3185                                 | -0.1984                             | -1.712  | 0.0932        | 0.238 |
|                                       | right | 14186.1                                    | -48.0756                                 | -0.3389                             | -2.912  | <b>0.0054</b> | 0.384 |
| Cuneus <sup>(10)</sup>                | left  | 8128.9                                     | 2.9322                                   | 0.0361                              | 0.215   | 0.8304        | 0.031 |
|                                       | right | 8376.5                                     | 5.6578                                   | 0.0675                              | 0.448   | 0.6558        | 0.064 |
| Entorhinal cortex <sup>(10)</sup>     | left  | 1031.9                                     | 1.7091                                   | 0.1656                              | 0.636   | 0.5280        | 0.09  |
|                                       | right | 1559.0                                     | 2.0002                                   | 0.1283                              | 0.546   | 0.5876        | 0.078 |

**Supplemental table 4:** Results of linear regression of anatomical ROI-volumes (**native volume data, without adjustment**), depending on age

Reference image = MNI single subject template

| Region                                  | Side  | Volume offset<br>(20 y) [mm <sup>3</sup> ] | Volume slope<br>[mm <sup>3</sup> / year] | relative Volume<br>slope [% / year] | t-Value | P             | R     |
|-----------------------------------------|-------|--------------------------------------------|------------------------------------------|-------------------------------------|---------|---------------|-------|
| Fascia dentata <sup>(2)</sup>           | left  | 3747.4                                     | -2.2362                                  | -0.0597                             | -0.475  | 0.6372        | 0.068 |
|                                         | right | 4134.6                                     | -7.0492                                  | -0.1705                             | -1.526  | 0.1334        | 0.213 |
| G. cinguli <sup>(10)</sup>              | left  | 21635.9                                    | -43.8072                                 | -0.2025                             | -1.604  | 0.1151        | 0.223 |
|                                         | right | 21523.2                                    | -78.9052                                 | -0.3666                             | -2.765  | <b>0.0080</b> | 0.367 |
| G. frontalis inf. <sup>(10)</sup>       | left  | 21901.5                                    | -54.6099                                 | -0.2493                             | -2.012  | <b>0.0497</b> | 0.276 |
|                                         | right | 17458.2                                    | -37.4987                                 | -0.2148                             | -1.462  | 0.1503        | 0.204 |
| G. frontalis med. <sup>(10)</sup>       | left  | 23293.1                                    | -64.8232                                 | -0.2783                             | -2.071  | <b>0.0437</b> | 0.284 |
|                                         | right | 29497.5                                    | -73.0846                                 | -0.2478                             | -1.883  | 0.0656        | 0.26  |
| G. frontalis sup. <sup>(10)</sup>       | left  | 44797.5                                    | -51.0215                                 | -0.1139                             | -0.939  | 0.3523        | 0.133 |
|                                         | right | 58710.0                                    | -76.0907                                 | -0.1296                             | -1.077  | 0.2866        | 0.152 |
| G. frontoorbitalis lat. <sup>(10)</sup> | left  | 7581.4                                     | -25.7798                                 | -0.34                               | -2.174  | <b>0.0345</b> | 0.297 |
|                                         | right | 8821.2                                     | -23.4769                                 | -0.2661                             | -1.74   | 0.0881        | 0.241 |
| G. frontoorbitalis med. <sup>(10)</sup> | left  | 9169.3                                     | -33.5905                                 | -0.3663                             | -2.669  | <b>0.0103</b> | 0.356 |
|                                         | right | 11322.8                                    | -35.1181                                 | -0.3102                             | -2.401  | <b>0.0202</b> | 0.324 |
| G. fusiformis <sup>(10)</sup>           | left  | 15303.8                                    | 4.0512                                   | 0.0265                              | 0.179   | 0.8584        | 0.026 |
|                                         | right | 14387.4                                    | 1.572                                    | 0.0109                              | 0.082   | 0.9353        | 0.012 |
| G. lingualis <sup>(10)</sup>            | left  | 12381.3                                    | -6.3908                                  | -0.0516                             | -0.274  | 0.7850        | 0.039 |
|                                         | right | 13399                                      | -6.7048                                  | -0.05                               | -0.301  | 0.7644        | 0.043 |
| G. occipitalis inf. <sup>(10)</sup>     | left  | 6314.7                                     | -6.1508                                  | -0.0974                             | -0.396  | 0.6941        | 0.056 |
|                                         | right | 15061.9                                    | -28.3661                                 | -0.1883                             | -1.003  | 0.3208        | 0.142 |
| G. occipitalis med. <sup>(10)</sup>     | left  | 8967.8                                     | -2.3034                                  | -0.0257                             | -0.164  | 0.8705        | 0.023 |



**Supplemental table 4:** Results of linear regression of anatomical ROI-volumes (**native volume data, without adjustment**), depending on age

Reference image = MNI single subject template

| Region                               | Side  | Volume offset<br>(20 y) [mm <sup>3</sup> ] | Volume slope<br>[mm <sup>3</sup> / year] | relative Volume<br>slope [% / year] | t-Value | P             | R     |
|--------------------------------------|-------|--------------------------------------------|------------------------------------------|-------------------------------------|---------|---------------|-------|
|                                      | right | 6401.7                                     | -3.1801                                  | -0.0497                             | -0.289  | 0.7737        | 0.041 |
| G. occipitalis sup. <sup>(10)</sup>  | left  | 7800.2                                     | 5.7669                                   | 0.0739                              | 0.517   | 0.6077        | 0.074 |
|                                      | right | 7291.9                                     | 13.0311                                  | 0.1787                              | 0.919   | 0.3627        | 0.13  |
| G. parahippocampalis <sup>(10)</sup> | left  | 2547.7                                     | 3.9327                                   | 0.1544                              | 1.082   | 0.2843        | 0.153 |
|                                      | right | 3363.4                                     | 5.1477                                   | 0.1531                              | 1.08    | 0.2854        | 0.152 |
| G. postcentralis <sup>(10)</sup>     | left  | 28759.4                                    | -44.8612                                 | -0.156                              | -1.077  | 0.2869        | 0.152 |
|                                      | right | 20831.7                                    | -35.2785                                 | -0.1693                             | -1.308  | 0.1969        | 0.184 |
| G. precentralis <sup>(10)</sup>      | left  | 25523.4                                    | -20.3182                                 | -0.0796                             | -0.558  | 0.5793        | 0.079 |
|                                      | right | 20283.0                                    | -16.138                                  | -0.0796                             | -0.542  | 0.5900        | 0.077 |
| G. rectus <sup>(10)</sup>            | left  | 5604.4                                     | -19.5759                                 | -0.3493                             | -1.825  | 0.0741        | 0.252 |
|                                      | right | 5663.8                                     | -20.9605                                 | -0.3701                             | -2.498  | <b>0.0159</b> | 0.336 |
| G. supramarginalis <sup>(10)</sup>   | left  | 23152.5                                    | -66.9936                                 | -0.2894                             | -2.221  | <b>0.0310</b> | 0.302 |
|                                      | right | 18356.6                                    | -35.2092                                 | -0.1918                             | -1.388  | 0.1715        | 0.194 |
| G. temporalis inf. <sup>(10)</sup>   | left  | 15554.9                                    | 1.103                                    | 0.0071                              | 0.046   | 0.9631        | 0.007 |
|                                      | right | 13329.1                                    | -3.5075                                  | -0.0263                             | -0.171  | 0.8653        | 0.024 |
| G. temporalis med. <sup>(10)</sup>   | left  | 22350.5                                    | -16.1768                                 | -0.0724                             | -0.497  | 0.6212        | 0.071 |
|                                      | right | 22266.9                                    | -46.2485                                 | -0.2077                             | -1.472  | 0.1474        | 0.206 |
| G. temporalis sup. <sup>(10)</sup>   | left  | 28933.2                                    | -27.1118                                 | -0.0937                             | -0.674  | 0.5036        | 0.096 |
|                                      | right | 30603.3                                    | -23.8402                                 | -0.0779                             | -0.61   | 0.5444        | 0.087 |
| HATA <sup>(2)</sup>                  | left  | 422.2                                      | -0.9542                                  | -0.226                              | -1.536  | 0.1310        | 0.214 |
|                                      | right | 311.2                                      | -0.7154                                  | -0.2299                             | -1.351  | 0.1828        | 0.19  |

**Supplemental table 4:** Results of linear regression of anatomical ROI-volumes (**native volume data, without adjustment**), depending on age

Reference image = MNI single subject template

| Region                                  | Side  | Volume offset<br>(20 y) [mm <sup>3</sup> ] | Volume slope<br>[mm <sup>3</sup> / year] | relative Volume<br>slope [% / year] | t-Value | P             | R     |
|-----------------------------------------|-------|--------------------------------------------|------------------------------------------|-------------------------------------|---------|---------------|-------|
| Hippocampus <sup>(10)</sup>             | left  | 8159.5                                     | -2.8334                                  | -0.0347                             | -0.284  | 0.7774        | 0.041 |
|                                         | right | 8538.2                                     | -9.7907                                  | -0.1147                             | -1.08   | 0.2853        | 0.153 |
| Insula <sup>(10)</sup>                  | left  | 7551.4                                     | -13.7073                                 | -0.1815                             | -1.399  | 0.1680        | 0.196 |
|                                         | right | 8402.3                                     | -21.394                                  | -0.2546                             | -1.461  | 0.1503        | 0.204 |
| LD <sup>(10)</sup>                      | left  | 110.9                                      | 0.2911                                   | 0.2624                              | 0.746   | 0.4590        | 0.106 |
|                                         | right | 143.5                                      | -0.2242                                  | -0.1563                             | -0.503  | 0.6173        | 0.072 |
| LP <sup>(10)</sup>                      | left  | 627.4                                      | -1.4149                                  | -0.2255                             | -1.24   | 0.2210        | 0.174 |
|                                         | right | 717.3                                      | -2.4927                                  | -0.3475                             | -2.202  | <b>0.0324</b> | 0.3   |
| IML <sup>(10)</sup>                     | left  | 302.8                                      | -0.3505                                  | -0.1158                             | -0.601  | 0.5506        | 0.086 |
|                                         | right | 342.5                                      | -0.4902                                  | -0.1431                             | -0.626  | 0.5342        | 0.089 |
| Lobulus parietalis inf. <sup>(10)</sup> | left  | 15605.9                                    | -29.411                                  | -0.1885                             | -1.33   | 0.1896        | 0.187 |
|                                         | right | 12411.8                                    | -22.6452                                 | -0.1824                             | -1.448  | 0.1540        | 0.203 |
| Lobulus parietalis sup. <sup>(10)</sup> | left  | 17684.2                                    | -19.4278                                 | -0.1099                             | -0.763  | 0.4493        | 0.108 |
|                                         | right | 17835.6                                    | -50.5357                                 | -0.2833                             | -1.937  | 0.0585        | 0.267 |
| MD <sup>(10)</sup>                      | left  | 253.1                                      | 1.3103                                   | 0.5178                              | 1.651   | 0.1052        | 0.23  |
|                                         | right | 282.2                                      | 1.1921                                   | 0.4224                              | 1.4     | 0.1677        | 0.196 |
| Medulla <sup>(10)</sup>                 | mid   | 2807.1                                     | -6.5126                                  | -0.232                              | -1.446  | 0.1546        | 0.202 |
| Ncl. caudatus <sup>(10)</sup>           | left  | 5334.8                                     | -4.5151                                  | -0.0846                             | -0.596  | 0.5537        | 0.085 |
|                                         | right | 5304.9                                     | -3.1119                                  | -0.0587                             | -0.383  | 0.7035        | 0.055 |
| Ncl. paraventricularis <sup>(10)</sup>  | left  | 33.4                                       | 0.0702                                   | 0.2102                              | 0.829   | 0.4111        | 0.118 |
|                                         | right | 32.1                                       | -0.0072                                  | -0.0224                             | -0.087  | 0.9313        | 0.012 |

**Supplemental table 4:** Results of linear regression of anatomical ROI-volumes (**native volume data, without adjustment**), depending on age

Reference image = MNI single subject template

| Region                             | Side  | Volume offset<br>(20 y) [mm <sup>3</sup> ] | Volume slope<br>[mm <sup>3</sup> / year] | relative Volume<br>slope [% / year] | t-Value | P             | R     |
|------------------------------------|-------|--------------------------------------------|------------------------------------------|-------------------------------------|---------|---------------|-------|
| Ncl. ruber <sup>(10)</sup>         | left  | 609.9                                      | -1.273                                   | -0.2087                             | -1.199  | 0.2364        | 0.169 |
|                                    | right | 583.5                                      | -2.2137                                  | -0.3794                             | -2.45   | <b>0.0179</b> | 0.33  |
| pU <sup>(10)</sup>                 | left  | 962.7                                      | 0.7505                                   | 0.078                               | 0.509   | 0.6128        | 0.073 |
|                                    | right | 1000.4                                     | 0.7414                                   | 0.0741                              | 0.372   | 0.7118        | 0.053 |
| Pallidum pars ext. <sup>(10)</sup> | left  | 1467.4                                     | 1.0373                                   | 0.0707                              | 0.489   | 0.6270        | 0.07  |
|                                    | right | 1438.7                                     | 2.5735                                   | 0.1789                              | 0.946   | 0.3486        | 0.134 |
| Pallidum pars int. <sup>(10)</sup> | left  | 447.5                                      | -0.1843                                  | -0.0412                             | -0.267  | 0.7904        | 0.038 |
|                                    | right | 543.2                                      | 1.1168                                   | 0.2056                              | 0.985   | 0.3295        | 0.139 |
| Pons <sup>(10)</sup>               | mid   | 17662.6                                    | -38.465                                  | -0.2178                             | -1.318  | 0.1937        | 0.185 |
| Precuneus <sup>(10)</sup>          | left  | 11205.6                                    | -1.5745                                  | -0.0141                             | -0.096  | 0.9236        | 0.014 |
|                                    | right | 15117.8                                    | 12.4412                                  | 0.0823                              | 0.536   | 0.5941        | 0.076 |
| Putamen <sup>(10)</sup>            | left  | 5225                                       | -11.9506                                 | -0.2287                             | -2.098  | <b>0.0411</b> | 0.287 |
|                                    | right | 5385                                       | -8.6085                                  | -0.1599                             | -1.439  | 0.1565        | 0.201 |
| SII Op1 <sup>(9)</sup>             | left  | 6815.7                                     | -9.3294                                  | -0.1369                             | -0.755  | 0.4541        | 0.107 |
|                                    | right | 4765.8                                     | -2.5885                                  | -0.0543                             | -0.28   | 0.7809        | 0.04  |
| SII Op2 <sup>(9)</sup>             | left  | 1598.7                                     | -4.582                                   | -0.2866                             | -1.626  | 0.1103        | 0.226 |
|                                    | right | 2160.9                                     | -4.7756                                  | -0.221                              | -1.216  | 0.2297        | 0.171 |
| SII Op3 <sup>(9)</sup>             | left  | 3108                                       | -7.0354                                  | -0.2264                             | -1.366  | 0.1781        | 0.192 |
|                                    | right | 4548                                       | -10.0371                                 | -0.2207                             | -1.29   | 0.2030        | 0.181 |
| SII Op4 <sup>(9)</sup>             | left  | 5053.1                                     | -6.9504                                  | -0.1375                             | -0.712  | 0.4798        | 0.101 |
|                                    | right | 4547.3                                     | -4.9527                                  | -0.1089                             | -0.52   | 0.6057        | 0.074 |

**Supplemental table 4:** Results of linear regression of anatomical ROI-volumes (**native volume data, without adjustment**), depending on age

Reference image = MNI single subject template

| Region                            | Side  | Volume offset<br>(20 y) [mm <sup>3</sup> ] | Volume slope<br>[mm <sup>3</sup> / year] | relative Volume<br>slope [% / year] | t-Value | P             | R     |
|-----------------------------------|-------|--------------------------------------------|------------------------------------------|-------------------------------------|---------|---------------|-------|
| Subcallosal area <sup>(10)</sup>  | left  | 936.5                                      | -4.4892                                  | -0.4794                             | -2.696  | <b>0.0096</b> | 0.359 |
|                                   | right | 909.6                                      | -2.5996                                  | -0.2858                             | -1.537  | 0.1307        | 0.214 |
| Subiculum <sup>(10)</sup>         | left  | 6164.9                                     | 4.095                                    | 0.0664                              | 0.458   | 0.6489        | 0.065 |
|                                   | right | 6442.9                                     | 1.0181                                   | 0.0158                              | 0.13    | 0.8974        | 0.019 |
| Substantia grisea <sup>(10)</sup> | mid   | 120.2                                      | -0.1186                                  | -0.0986                             | -0.475  | 0.6368        | 0.068 |
| Thalamus <sup>(10)</sup>          | left  | 6091.5                                     | -15.5054                                 | -0.2545                             | -2.173  | <b>0.0347</b> | 0.296 |
|                                   | right | 5969.2                                     | -19.1834                                 | -0.3214                             | -2.501  | <b>0.0158</b> | 0.336 |
| VA <sup>(10)</sup>                | left  | 1128                                       | -4.8698                                  | -0.4317                             | -3.23   | <b>0.0022</b> | 0.419 |
|                                   | right | 1087.5                                     | -5.5606                                  | -0.5113                             | -3.854  | <b>0.0003</b> | 0.482 |
| Ventricle 3 <sup>(10)</sup>       | mid   | 508.5                                      | 11.1678                                  | 2.1964                              | 4.67    | <b>0.0000</b> | 0.555 |
| Ventricle 4 <sup>(10)</sup>       | mid   | 680.6                                      | 8.9703                                   | 1.318                               | 3       | <b>0.0042</b> | 0.394 |
| Ventricle lat.                    | left  | 4858.4                                     | 83.5639                                  | 1.72                                | 2.234   | <b>0.0300</b> | 0.304 |
|                                   | right | 4293.6                                     | 69.6349                                  | 1.6218                              | 1.877   | 0.0664        | 0.259 |
| Ventricle total                   | left  | 8084.8                                     | 110.661                                  | 1.3688                              | 2.464   | <b>0.0173</b> | 0.332 |
|                                   | right | 8047.5                                     | 108.5445                                 | 1.3488                              | 2.258   | <b>0.0284</b> | 0.307 |
| VL <sup>(10)</sup>                | left  | 1523.8                                     | -7.7994                                  | -0.5118                             | -3.683  | <b>0.0006</b> | 0.466 |
|                                   | right | 1582.6                                     | -9.4882                                  | -0.5995                             | -4.626  | <b>0.0000</b> | 0.551 |
| VPL <sup>(10)</sup>               | left  | 708.4                                      | -2.9468                                  | -0.416                              | -2.626  | <b>0.0115</b> | 0.351 |
|                                   | right | 438.6                                      | -2.1421                                  | -0.4884                             | -3.241  | <b>0.0021</b> | 0.42  |

**Supplemental table 5:** Results of linear regression of anatomical ROI-volumes (**volume data adjusted by skull size** ), depending on age

Reference image = MR image of a 18 years old male subject

| Region                                | Side  | Volume offset<br>(20 y) [mm <sup>3</sup> ] | Volume slope<br>[mm <sup>3</sup> / year] | relative Volume<br>slope [% / year] | t-Value | P             | R     |
|---------------------------------------|-------|--------------------------------------------|------------------------------------------|-------------------------------------|---------|---------------|-------|
| Total Brain                           | left  | 757418.3                                   | -1303.67                                 | -0.1721                             | -1.84   | 0.0719        | 0.254 |
|                                       | right | 756519.0                                   | -1295.0559                               | -0.1712                             | -1.773  | 0.0825        | 0.246 |
| ANT                                   | left  | 149.3                                      | -0.4907                                  | -0.3285                             | -1.616  | 0.1125        | 0.225 |
|                                       | right | 157.3                                      | -0.5823                                  | -0.3703                             | -2.064  | <b>0.0443</b> | 0.283 |
| Area 3a                               | left  | 5230                                       | -9.8003                                  | -0.1874                             | -1.752  | 0.086         | 0.243 |
|                                       | right | 5168.2                                     | -13.4583                                 | -0.2604                             | -2.035  | <b>0.0473</b> | 0.279 |
| Cerebellum                            | left  | 82621.5                                    | -222.7901                                | -0.2697                             | -2.215  | <b>0.0315</b> | 0.302 |
|                                       | right | 80487.7                                    | -202.8071                                | -0.252                              | -2.004  | 0.0506        | 0.275 |
| Cerebellum WM                         | left  | 28246.8                                    | -162.5647                                | -0.5755                             | -3.21   | <b>0.0023</b> | 0.417 |
|                                       | right | 22910.8                                    | -97.7985                                 | -0.4269                             | -2.501  | <b>0.0158</b> | 0.336 |
| Cerebellum lobus<br>flocculonodularis | left  | 622.9                                      | -1.591                                   | -0.2554                             | -1.426  | 0.1601        | 0.2   |
|                                       | right | 441.7                                      | -1.7614                                  | -0.3987                             | -2.359  | <b>0.0224</b> | 0.319 |
| Corticospinal tract                   | left  | 15406.8                                    | -35.6809                                 | -0.2316                             | -2.438  | <b>0.0184</b> | 0.329 |
|                                       | right | 12512.1                                    | -40.142                                  | -0.3208                             | -3.068  | <b>0.0035</b> | 0.401 |
| G. frontalis med.                     | left  | 25013.8                                    | -83.3709                                 | -0.3333                             | -2.824  | <b>0.0068</b> | 0.374 |
|                                       | right | 29398.4                                    | -43.3489                                 | -0.1475                             | -1.219  | 0.2288        | 0.172 |
| G. frontalis sup.                     | left  | 45358                                      | -123.7516                                | -0.2728                             | -2.338  | <b>0.0235</b> | 0.317 |
|                                       | right | 56148.3                                    | -127.9686                                | -0.2279                             | -2.187  | <b>0.0336</b> | 0.298 |
| G. frontoorbitalis lat.               | left  | 6616                                       | -10.7102                                 | -0.1619                             | -1.169  | 0.2479        | 0.165 |
|                                       | right | 8629.3                                     | -26.5837                                 | -0.3081                             | -2.389  | <b>0.0208</b> | 0.323 |
| G. frontoorbitalis med.               | left  | 10208.7                                    | -40.1144                                 | -0.3929                             | -3.57   | <b>0.0008</b> | 0.454 |
|                                       | right | 11860.5                                    | -46.2811                                 | -0.3902                             | -3.215  | <b>0.0023</b> | 0.417 |
| G. rectus                             | left  | 6409.9                                     | -25.098                                  | -0.3916                             | -2.672  | <b>0.0102</b> | 0.357 |
|                                       | right | 5406                                       | -26.8258                                 | -0.4962                             | -3.53   | <b>0.0009</b> | 0.45  |
| G. supramarginalis                    | left  | 23369.2                                    | -79.5406                                 | -0.3404                             | -2.302  | <b>0.0256</b> | 0.312 |
|                                       | right | 18908.1                                    | -65.6787                                 | -0.3474                             | -2.658  | <b>0.0106</b> | 0.355 |

**Supplemental table 5:** Results of linear regression of anatomical ROI-volumes (**volume data adjusted by skull size** ), depending on age

Reference image = MR image of a 18 years old male subject

| Region             | Side  | Volume offset<br>(20 y) [mm <sup>3</sup> ] | Volume slope<br>[mm <sup>3</sup> / year] | relative Volume<br>slope [% / year] | t-Value | P             | R     |
|--------------------|-------|--------------------------------------------|------------------------------------------|-------------------------------------|---------|---------------|-------|
| G. temporalis med. | left  | 22755                                      | -46.0228                                 | -0.2023                             | -1.735  | 0.0890        | 0.241 |
|                    | right | 22034.9                                    | -54.8256                                 | -0.2488                             | -2.553  | <b>0.0138</b> | 0.343 |
| HATA               | left  | 434.6                                      | -1.3012                                  | -0.2994                             | -1.8    | 0.0781        | 0.249 |
|                    | right | 344.6                                      | -1.2021                                  | -0.3488                             | -2.359  | <b>0.0223</b> | 0.319 |
| Insula             | left  | 8193.9                                     | -14.8764                                 | -0.1816                             | -1.745  | 0.0872        | 0.242 |
|                    | right | 9150.9                                     | -22.6929                                 | -0.248                              | -2.026  | <b>0.0482</b> | 0.278 |
| LP                 | left  | 617.3                                      | -0.3131                                  | -0.0507                             | -0.246  | 0.8064        | 0.035 |
|                    | right | 717.4                                      | -2.4266                                  | -0.3382                             | -2.462  | <b>0.0174</b> | 0.332 |
| Ncl. ruber         | left  | 868.3                                      | -3.7205                                  | -0.4285                             | -2.753  | <b>0.0083</b> | 0.366 |
|                    | right | 755.1                                      | -3.6554                                  | -0.4841                             | -3.246  | <b>0.0021</b> | 0.421 |
| Putamen            | left  | 5261.4                                     | -12.8646                                 | -0.2445                             | -2.235  | <b>0.0300</b> | 0.304 |
|                    | right | 5327.7                                     | -11.1867                                 | -0.21                               | -1.868  | 0.0677        | 0.258 |
| Thalamus           | left  | 5960.9                                     | -8.412                                   | -0.1411                             | -1.127  | 0.2653        | 0.159 |
|                    | right | 5925.7                                     | -17.8374                                 | -0.301                              | -2.678  | <b>0.0100</b> | 0.357 |
| VA                 | left  | 1067.3                                     | -3.8278                                  | -0.3586                             | -2.483  | <b>0.0165</b> | 0.334 |
|                    | right | 964.5                                      | -4.5841                                  | -0.4753                             | -3.693  | <b>0.0006</b> | 0.467 |
| VL                 | left  | 1350.7                                     | -5.034                                   | -0.3727                             | -2.807  | <b>0.0072</b> | 0.372 |
|                    | right | 1393                                       | -6.675                                   | -0.4792                             | -3.944  | <b>0.0003</b> | 0.491 |
| VPL                | left  | 502.6                                      | -0.6297                                  | -0.1253                             | -0.97   | 0.3368        | 0.137 |
|                    | right | 369.1                                      | -1.1902                                  | -0.3225                             | -2.259  | <b>0.0284</b> | 0.307 |
| Ventricle 3        | mid   | 520.9                                      | 6.141                                    | 1.179                               | 3.935   | <b>0.0003</b> | 0.49  |
| Ventricles lat.    | left  | 5995.9                                     | 87.3082                                  | 1.4561                              | 2.17    | <b>0.0349</b> | 0.296 |
|                    | right | 4895.9                                     | 79.5674                                  | 1.6252                              | 1.81    | 0.0765        | 0.25  |
| Ventricle total    | left  | 10028.4                                    | 119.2442                                 | 1.1891                              | 2.398   | <b>0.0203</b> | 0.324 |
|                    | right | 7970.5                                     | 100.5047                                 | 1.261                               | 1.918   | 0.0609        | 0.264 |

**Supplemental table 6:** Results of linear regression of anatomical ROI-volumes (**volume data adjusted by skull size**), depending on age

Reference image = MR image of a 51 years old male subject

| Region                  | Side  | Volume offset<br>(20 y) [mm <sup>3</sup> ] | Volume slope<br>[mm <sup>3</sup> / year] | relative Volume<br>slope [% / year] | t-Value | P             | R     |
|-------------------------|-------|--------------------------------------------|------------------------------------------|-------------------------------------|---------|---------------|-------|
| Total Brain             | left  | 766233.8                                   | -1275.8333                               | -0.1665                             | -1.763  | 0.0841        | 0.244 |
|                         | right | 745440.1                                   | -1307.9054                               | -0.1755                             | -1.833  | 0.0729        | 0.253 |
| Area 3a                 | left  | 5962.7                                     | -17.6793                                 | -0.2965                             | -2.694  | <b>0.0096</b> | 0.359 |
|                         | right | 5539                                       | -14.9802                                 | -0.2704                             | -2.214  | <b>0.0315</b> | 0.302 |
| Area 4p                 | left  | 8630.5                                     | -25.3065                                 | -0.2932                             | -2.448  | <b>0.018</b>  | 0.33  |
|                         | right | 8047.9                                     | -16.341                                  | -0.203                              | -1.549  | 0.1278        | 0.216 |
| Area 6                  | left  | 36750                                      | -34.3817                                 | -0.0936                             | -0.642  | 0.5236        | 0.091 |
|                         | right | 32755.9                                    | -92.3847                                 | -0.282                              | -2.164  | <b>0.0354</b> | 0.295 |
| Cerebellum              | left  | 78072                                      | -262.1727                                | -0.3358                             | -2.41   | <b>0.0197</b> | 0.326 |
|                         | right | 81436.2                                    | -248.1367                                | -0.3047                             | -2.389  | <b>0.0208</b> | 0.323 |
| Corpus mamillare        | left  | 28.3                                       | 0.164                                    | 0.5786                              | 1.49    | 0.1427        | 0.208 |
|                         | right | 22.7                                       | 0.2361                                   | 1.0416                              | 2.061   | <b>0.0446</b> | 0.282 |
| Cerebellum WM           | left  | 21928.1                                    | -136.8577                                | -0.6241                             | -2.966  | <b>0.0047</b> | 0.39  |
|                         | right | 20257.9                                    | -91.4611                                 | -0.4515                             | -2.464  | <b>0.0173</b> | 0.332 |
| Corticospinal tract     | left  | 15469.3                                    | -38.9635                                 | -0.2519                             | -2.608  | <b>0.012</b>  | 0.349 |
|                         | right | 13236.9                                    | -43.2096                                 | -0.3264                             | -3      | <b>0.0042</b> | 0.394 |
| G. cinguli              | left  | 27409.9                                    | -79.783                                  | -0.2911                             | -2.374  | <b>0.0215</b> | 0.321 |
|                         | right | 19694                                      | -63.8868                                 | -0.3244                             | -2.794  | <b>0.0074</b> | 0.371 |
| G. frontalis med.       | left  | 21791.5                                    | -65.5519                                 | -0.3008                             | -2.163  | <b>0.0355</b> | 0.295 |
|                         | right | 29152.2                                    | -70.4949                                 | -0.2418                             | -1.821  | 0.0747        | 0.252 |
| G. frontalis sup.       | left  | 51566                                      | -89.0574                                 | -0.1727                             | -1.645  | 0.1065        | 0.229 |
|                         | right | 54449.6                                    | -187.1885                                | -0.3438                             | -3.055  | <b>0.0036</b> | 0.4   |
| G. frontoorbitalis lat. | left  | 7655.7                                     | -27.0333                                 | -0.3531                             | -2.424  | <b>0.0191</b> | 0.327 |
|                         | right | 8297.2                                     | -19.7839                                 | -0.2384                             | -1.752  | 0.0861        | 0.243 |
| G. frontoorbitalis med. | left  | 9598.4                                     | -32.2826                                 | -0.3363                             | -2.776  | <b>0.0078</b> | 0.369 |
|                         | right | 11625.6                                    | -42.5781                                 | -0.3662                             | -3.144  | <b>0.0028</b> | 0.41  |

**Supplemental table 6:** Results of linear regression of anatomical ROI-volumes (**volume data adjusted by skull size**), depending on age

Reference image = MR image of a 51 years old male subject

| Region                 | Side  | Volume offset<br>(20 y) [mm <sup>3</sup> ] | Volume slope<br>[mm <sup>3</sup> / year] | relative Volume<br>slope [% / year] | t-Value | P             | R     |
|------------------------|-------|--------------------------------------------|------------------------------------------|-------------------------------------|---------|---------------|-------|
| G. rectus              | left  | 6335.4                                     | -22.7418                                 | -0.359                              | -2.523  | <b>0.0149</b> | 0.339 |
|                        | right | 5070                                       | -17.7118                                 | -0.3493                             | -2.451  | <b>0.0179</b> | 0.33  |
| G. supramarginalis     | left  | 21816.9                                    | -76.057                                  | -0.3486                             | -2.365  | <b>0.022</b>  | 0.32  |
|                        | right | 17738                                      | -33.6689                                 | -0.1898                             | -1.372  | 0.1762        | 0.192 |
| G. temporalis med.     | left  | 22209.1                                    | -31.4838                                 | -0.1418                             | -1.233  | 0.2236        | 0.173 |
|                        | right | 22771                                      | -61.1553                                 | -0.2686                             | -2.691  | <b>0.0097</b> | 0.359 |
| Ncl. paraventricularis | left  | 38.6                                       | -0.193                                   | -0.5003                             | -3.509  | <b>0.001</b>  | 0.448 |
|                        | right | 45.5                                       | -0.1639                                  | -0.3605                             | -1.954  | 0.0564        | 0.269 |
| Ncl. ruber             | left  | 552.4                                      | -2.4615                                  | -0.4456                             | -2.859  | <b>0.0062</b> | 0.378 |
|                        | right | 492                                        | -2.3042                                  | -0.4683                             | -3.064  | <b>0.0035</b> | 0.401 |
| Putamen                | left  | 5439.6                                     | -14.7623                                 | -0.2714                             | -2.385  | <b>0.021</b>  | 0.323 |
|                        | right | 5608.2                                     | -13.506                                  | -0.2408                             | -1.824  | 0.0743        | 0.252 |
| Thalamus               | left  | 5974.6                                     | -9.5586                                  | -0.16                               | -1.281  | 0.2061        | 0.18  |
|                        | right | 5850.3                                     | -14.925                                  | -0.2551                             | -2.143  | <b>0.0371</b> | 0.293 |
| VA                     | left  | 1003.8                                     | -4.7734                                  | -0.4755                             | -3.289  | <b>0.0019</b> | 0.425 |
|                        | right | 1036.6                                     | -5.8245                                  | -0.5619                             | -4.047  | <b>0.0002</b> | 0.5   |
| VL                     | left  | 1356.6                                     | -5.9968                                  | -0.442                              | -3.303  | <b>0.0018</b> | 0.427 |
|                        | right | 1367.7                                     | -7.6244                                  | -0.5575                             | -4.532  | <b>0.0000</b> | 0.543 |
| Ventricle 4            | mid   | 767.5                                      | 9.5227                                   | 1.2407                              | 2.878   | <b>0.0059</b> | 0.38  |
| Ventricles lat.        | left  | 6850.6                                     | 88.2882                                  | 1.2888                              | 2.052   | <b>0.0456</b> | 0.281 |
|                        | right | 5474                                       | 85.8463                                  | 1.5683                              | 1.911   | 0.0619        | 0.263 |
| Ventricle total        | left  | 10833.1                                    | 120.9291                                 | 1.1163                              | 2.298   | <b>0.0259</b> | 0.312 |
|                        | right | 8842.1                                     | 107.963                                  | 1.221                               | 1.983   | 0.0529        | 0.273 |
